# Supplementary material for: Seasonal Variability of Volatile Components in Calypogeia integristipula
Source: MDPI journal article supplement (doi:10.3390/molecules28217276), 2023-10-26
Supplement: s1 [file s1]

## Seasonal Variability on Volatile Components in *Calypogeia integristipula*

Rafał Wawrzyniak <sup>1,\*</sup>, Małgorzata Guzowska <sup>1</sup>, Wiesław Wasiak <sup>1</sup>, Beata Jasiewicz <sup>1</sup>, Alina Bączkiewicz <sup>2</sup> and Katarzyna Buczkowska <sup>2</sup>

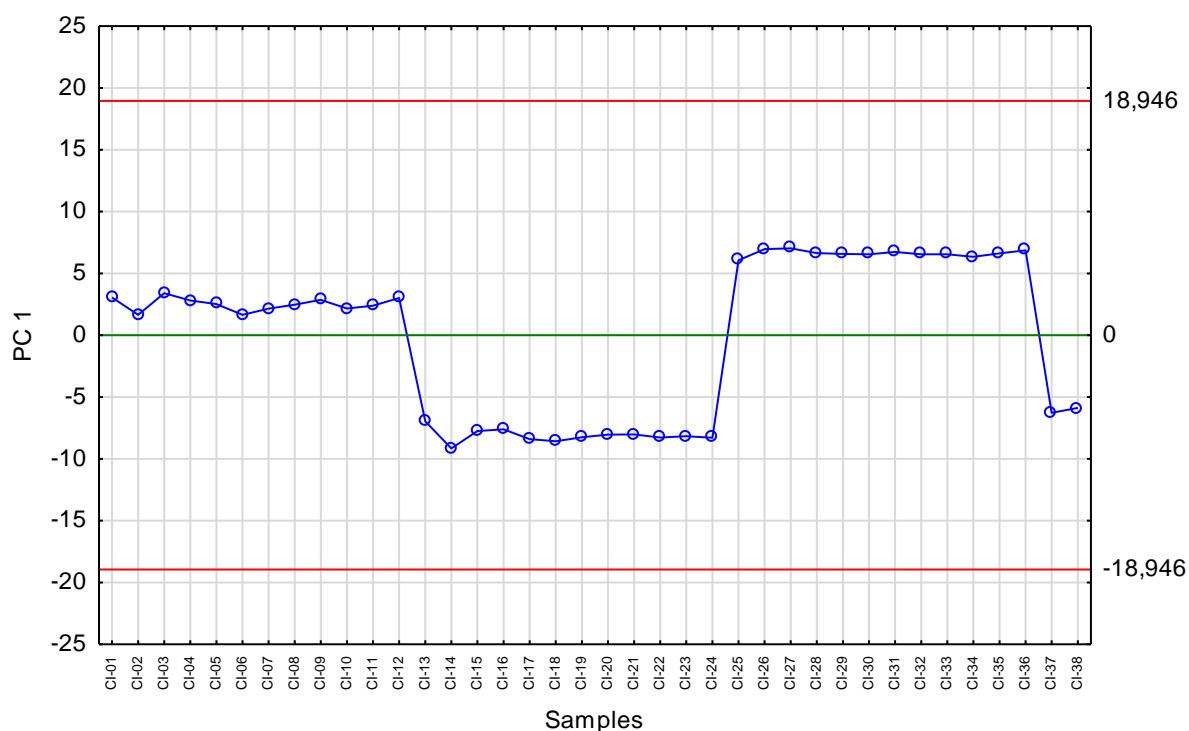

**Figure S1.** Line plot of the principal component PC1 for the examined samples of *Calypogeia integristipula* based on all 79 detected compounds. The red lines represent  $\pm 3.00$  standard deviations. SD: 6.315.

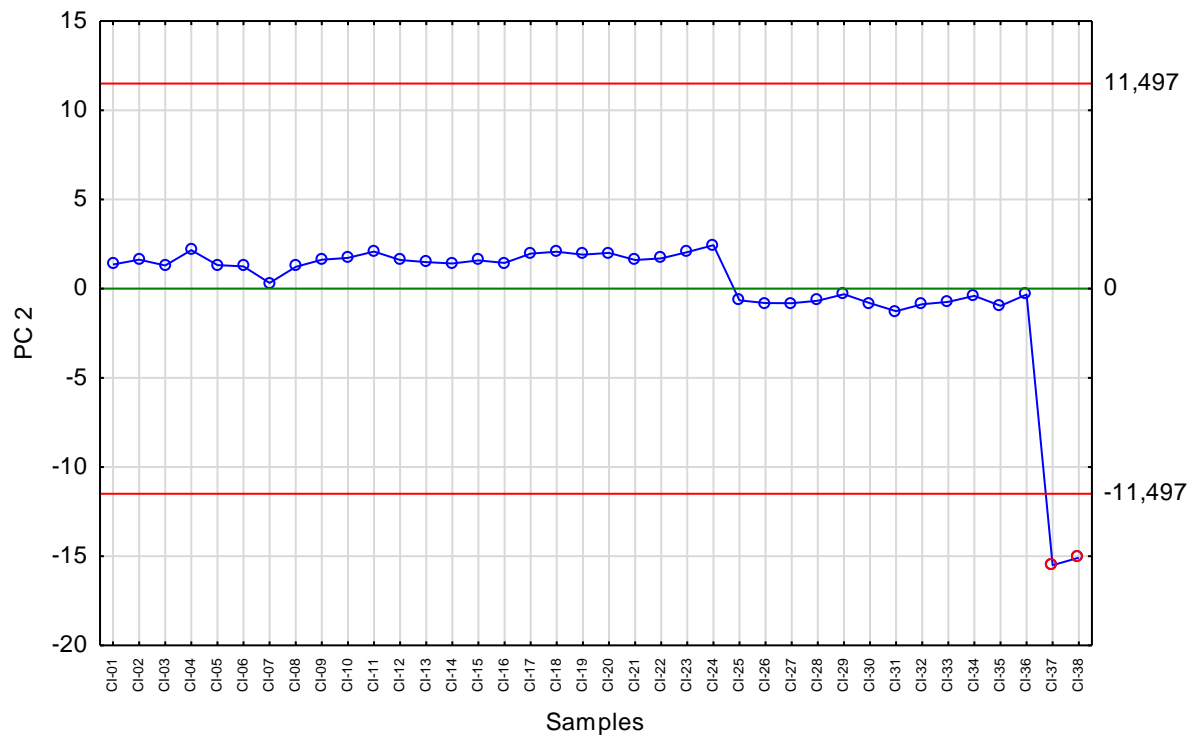

**Figure S2.** Line plot of the principal component PC2 for the examined samples of *Calypogeia integristipula* based on all 79 detected compounds. The red lines represent  $\pm 3.00$  standard deviations. SD: 3.832.

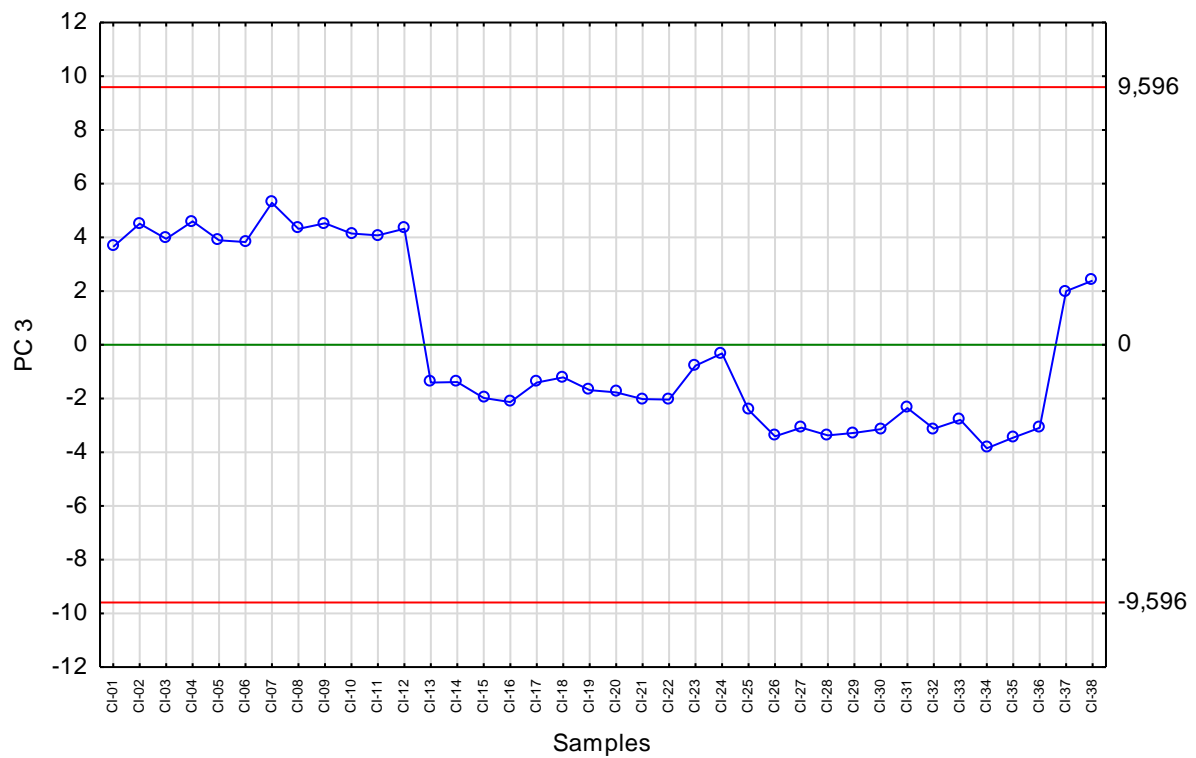

**Figure S3.** Line plot of the principal component PC3 for the examined samples of *Calypogeia integristipula* based on all 79 detected compounds. The red lines represent  $\pm 3.00$  standard deviations. SD: 3.199.

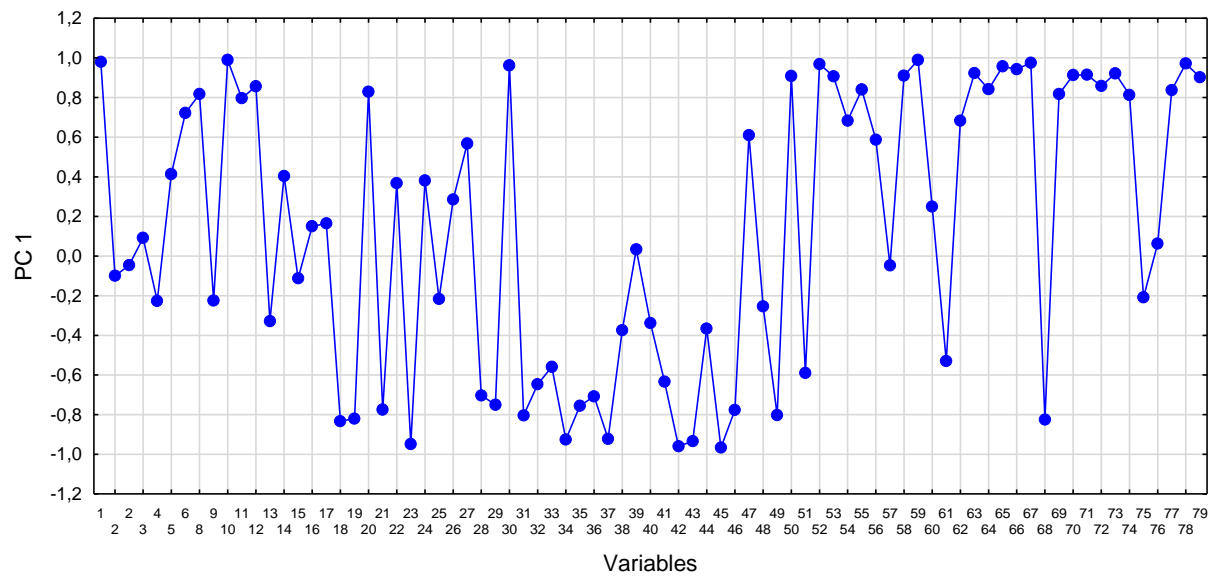

**Figure S4.** Linear plot of the lodgings for the first principal component PC1.

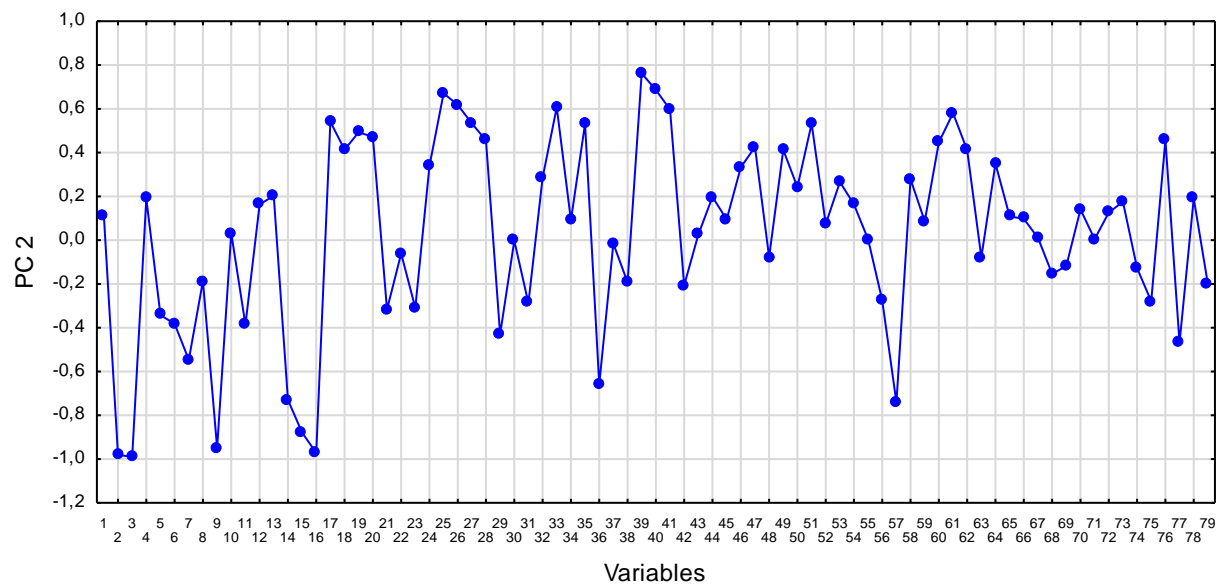

**Figure S5.** Linear plot of the lodgings for the second principal component PC2.

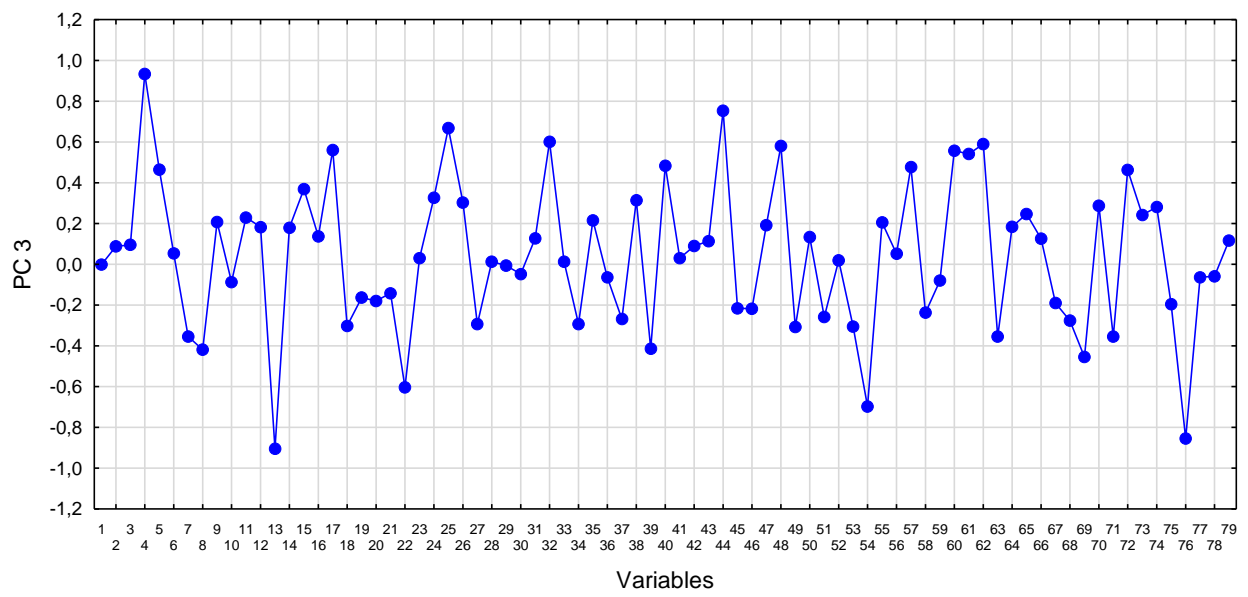

**Figure S6.** Linear plot of the lodgings for the third principal component PC3.

**Table S1.** The *Calypogeia integristipula* sampling data in 2021 year used for studies divided into collecting season.

| Sample Code   | Collection Place                                         | Geographical Coordinates   | Date month year |
|---------------|----------------------------------------------------------|----------------------------|-----------------|
| <b>Spring</b> |                                                          |                            |                 |
| CI-39         | South-Eastern Poland, Bieszczady Mts, Rozsypianiec       | 49°03'35.5"N, 22°46'10.7"E | 05.2021         |
| CI-40         | Southern Poland, Tatry Mts, Morskie Oko                  | 49°12'00.0"N, 20°04'24.3"E | 05.2021         |
| CI-41         | Southern Poland, Tatry Mts, Gąsienicowa Valley           | 49°14'45.8"N, 20°00'25.1"E | 05.2021         |
| CI-42         | Southern Poland, Tatry Mts, Kościeliska Valley           | 49°15'18.3"N, 19°51'55.4"E | 05.2021         |
| CI-43         | Southern Poland, Małe Pieniny Mts                        | 49°22'56.8"N, 20°33'18.9"E | 05.2021         |
| CI-44         | Southern Poland, Pieniny Mts, Potok Kotłowy stream       | 49°24'22.5"N, 20°24'02.1"E | 05.2021         |
| CI-45         | Southern Poland, Gorce Mts, Ochotnica Dolna              | 49°32'04.5"N, 20°19'00.0"E | 05.2021         |
| CI-46         | Central Poland, Wielkopolska, Antonin                    | 51°30'59.8"N, 17°50'58.1"E | 05.2021         |
| CI-47         | Western Poland, Lubuskie, Nabloto                        | 51°47'31.4"N, 14°46'55.8"E | 05.2021         |
| CI-48         | North-Eastern Poland, Suwałki Lake District, Lake Łempis | 54°02'38.2"N, 23°28'10.8"E | 05.2021         |
| CI-49         | North-Western Poland, Pomerania, Lake Czarne             | 54°22'50.7"N, 18°12'07.6"E | 05.2021         |
| CI-50         | North-Western Poland, Pomerania, Lake Lubygość           | 54°24'46.7"N, 17°58'44.0"E | 05.2021         |
| <b>Summer</b> |                                                          |                            |                 |
| CI-51         | South-Eastern Poland, Bieszczady Mts, Rozsypianiec       | 49°03'35.5"N, 22°46'10.7"E | 07.2021         |
| CI-52         | Southern Poland, Tatry Mts, Morskie Oko                  | 49°12'00.0"N, 20°04'24.3"E | 07.2021         |
| CI-53         | Southern Poland, Tatry Mts, Gąsienicowa Valley           | 49°14'45.8"N, 20°00'25.1"E | 07.2021         |
| CI-54         | Southern Poland, Tatry Mts, Kościeliska Valley           | 49°15'18.3"N, 19°51'55.4"E | 07.2021         |
| CI-55         | Southern Poland, Małe Pieniny Mts                        | 49°22'56.8"N, 20°33'18.9"E | 07.2021         |
| CI-56         | Southern Poland, Pieniny Mts, Potok Kotłowy stream       | 49°24'22.5"N, 20°24'02.1"E | 07.2021         |
| CI-57         | Southern Poland, Gorce Mts, Ochotnica Dolna              | 49°32'04.5"N, 20°19'00.0"E | 07.2021         |
| CI-58         | Central Poland, Wielkopolska, Antonin                    | 51°30'59.8"N, 17°50'58.1"E | 07.2021         |
| CI-59         | Western Poland, Lubuskie, Nabloto                        | 51°47'31.4"N, 14°46'55.8"E | 07.2021         |
| CI-60         | North-Eastern Poland, Suwałki Lake District, Lake Łempis | 54°02'38.2"N, 23°28'10.8"E | 07.2021         |
| CI-61         | North-Western Poland, Pomerania, Lake Czarne             | 54°22'50.7"N, 18°12'07.6"E | 07.2021         |
| CI-62         | North-Western Poland, Pomerania, Lake Lubygość           | 54°24'46.7"N, 17°58'44.0"E | 07.2021         |
| <b>Autumn</b> |                                                          |                            |                 |
| CI-63         | South-Eastern Poland, Bieszczady Mts, Rozsypianiec       | 49°03'35.5"N, 22°46'10.7"E | 09.2021         |
| CI-64         | Southern Poland, Tatry Mts, Morskie Oko                  | 49°12'00.0"N, 20°04'24.3"E | 09.2021         |
| CI-65         | Southern Poland, Tatry Mts, Gąsienicowa Valley           | 49°14'45.8"N, 20°00'25.1"E | 09.2021         |
| CI-66         | Southern Poland, Tatry Mts, Kościeliska Valley           | 49°15'18.3"N, 19°51'55.4"E | 09.2021         |
| CI-67         | Southern Poland, Małe Pieniny Mts                        | 49°22'56.8"N, 20°33'18.9"E | 09.2021         |
| CI-68         | Southern Poland, Pieniny Mts, Potok Kotłowy stream       | 49°24'22.5"N, 20°24'02.1"E | 09.2021         |
| CI-69         | Southern Poland, Gorce Mts, Ochotnica Dolna              | 49°32'04.5"N, 20°19'00.0"E | 09.2021         |
| CI-70         | Central Poland, Wielkopolska, Antonin                    | 51°30'59.8"N, 17°50'58.1"E | 09.2021         |
| CI-71         | Western Poland, Lubuskie, Nabloto                        | 51°47'31.4"N, 14°46'55.8"E | 09.2021         |
| CI-72         | North-Eastern Poland, Suwałki Lake District, Lake Łempis | 54°02'38.2"N, 23°28'10.8"E | 09.2021         |
| CI-73         | North-Western Poland, Pomerania, Lake Czarne             | 54°22'50.7"N, 18°12'07.6"E | 09.2021         |
| CI-74         | North-Western Poland, Pomerania, Lake Lubygość           | 54°24'46.7"N, 17°58'44.0"E | 09.2021         |

**Table S2a.** Volatile compounds detected in the samples collected in spring (CI-39 – CI-44).

| No. | Compounds*                      | RI**                    | RI***             | Code****     |              |              |              |              |              |
|-----|---------------------------------|-------------------------|-------------------|--------------|--------------|--------------|--------------|--------------|--------------|
|     |                                 |                         |                   | CI-39        | CI-40        | CI-41        | CI-42        | CI-43        | CI-44        |
| 1   | propan-1-ol                     | <700 <sup>a,b</sup>     | 483 <sup>a</sup>  | 1.09 (0.03)  | 1.12 (0.02)  | 1.15 (0.01)  | 1.12 (0.02)  | 1.01 (0.03)  | 0.98 (0.03)  |
| 2   | pentanal                        | 705 <sup>a,b,c,d</sup>  | 704 <sup>c</sup>  | 0.41 (0.02)  | 0.35 (0.04)  | 0.41 (0.02)  | 0.36 (0.03)  | 0.22 (0.02)  | 0.33 (0.02)  |
| 3   | hexanal                         | 802 <sup>a,b,c,d</sup>  | 801 <sup>c</sup>  | 0.21 (0.04)  | 0.24 (0.03)  | 0.19 (0.03)  | 0.23 (0.01)  | 0.25 (0.02)  | 0.21 (0.02)  |
| 4   | hexan-1-ol                      | 867 <sup>a,b</sup>      | 869 <sup>a</sup>  | 0.47 (0.06)  | 0.51 (0.06)  | 0.47 (0.03)  | 0.47 (0.03)  | 0.45 (0.03)  | 0.39 (0.03)  |
| 5   | heptanal                        | 902 <sup>a,b,c,d</sup>  | 901 <sup>c</sup>  | 0.07 (0.02)  | 0.08 (0.01)  | 0.03 (0.02)  | 0.04 (0.02)  | 0.07 (0.01)  | 0.11 (0.01)  |
| 6   | α-pinene                        | 939 <sup>a,b,c</sup>    | 932 <sup>c</sup>  | 0.03 (0.01)  | 0.02 (0.01)  | 0.02 (0.01)  | 0.06 (0.01)  | 0.02 (0.01)  | 0.03 (0.01)  |
| 7   | benzaldehyde                    | 940 <sup>a,b,c</sup>    | 952 <sup>c</sup>  | 0.21 (0.02)  | 0.18 (0.05)  | 0.13 (0.02)  | 0.23 (0.02)  | 0.18 (0.02)  | 0.15 (0.02)  |
| 8   | 2-ethylhexan-1-ol               | 1023 <sup>a,b</sup>     | 1025 <sup>a</sup> | 0.07 (0.03)  | 0.10 (0.01)  | 0.04 (0.02)  | 0.05 (0.03)  | 0.12 (0.03)  | 0.12 (0.03)  |
| 9   | phenylmethanol                  | 1028 <sup>a,b,c</sup>   | 1026 <sup>c</sup> | 1.13 (0.02)  | 1.15 (0.05)  | 1.23 (0.03)  | 1.09 (0.03)  | 1.15 (0.02)  | 1.11 (0.04)  |
| 10  | phenylacetaldehyde              | 1044 <sup>a,b</sup>     | 1044 <sup>a</sup> | 1.15 (0.03)  | 1.22 (0.02)  | 1.13 (0.02)  | 1.09 (0.04)  | 1.21 (0.05)  | 1.09 (0.04)  |
| 11  | nonanal                         | 1102 <sup>a,b,c,d</sup> | 1100 <sup>c</sup> | 0.13 (0.02)  | 0.09 (0.04)  | 0.12 (0.04)  | 0.10 (0.01)  | 0.10 (0.02)  | 0.13 (0.02)  |
| 12  | 3,4-dimethylcyclohexan-1-ol     | 1115 <sup>a,b</sup>     | 1126 <sup>a</sup> | 0.10 (0.02)  | 0.07 (0.05)  | 0.10 (0.02)  | 0.08 (0.01)  | 0.10 (0.01)  | 0.06 (0.03)  |
| 13  | phenylethanol                   | 1121 <sup>a,b</sup>     | 1121 <sup>a</sup> | 0.13 (0.02)  | 0.12 (0.05)  | 0.11 (0.01)  | 0.14 (0.02)  | 0.12 (0.03)  | 0.15 (0.03)  |
| 14  | decanal                         | 1195 <sup>a,b,c,d</sup> | 1201 <sup>c</sup> | 0.06 (0.01)  | 0.04 (0.02)  | 0.02 (0.01)  | 0.06 (0.01)  | 0.05 (0.02)  | 0.05 (0.01)  |
| 15  | β-cyclocitral                   | 1221 <sup>c</sup>       | 1217 <sup>c</sup> | 0.09 (0.02)  | 0.06 (0.01)  | 0.06 (0.03)  | 0.08 (0.01)  | 0.06 (0.01)  | 0.09 (0.02)  |
| 16  | 2-phenoxyethan-1-ol             | 1225 <sup>a,b</sup>     | 1226 <sup>a</sup> | 0.97 (0.03)  | 0.78 (0.03)  | 1.01 (0.02)  | 0.98 (0.02)  | 0.95 (0.04)  | 0.92 (0.04)  |
| 17  | bicycloelemene                  | 1316 <sup>a</sup>       | 1330 <sup>a</sup> | 0.15 (0.02)  | 0.10 (0.02)  | 0.09 (0.01)  | 0.15 (0.03)  | 0.12 (0.02)  | 0.11 (0.02)  |
| 18  | δ-elemene                       | 1324 <sup>a,b,c</sup>   | 1335 <sup>c</sup> | 0.73 (0.03)  | 0.75 (0.03)  | 0.69 (0.02)  | 0.82 (0.04)  | 0.83 (0.03)  | 0.85 (0.03)  |
| 19  | 204[M+](5) 121(100) 93(89)      | 1343                    | ND                | 0.19 (0.02)  | 0.21 (0.02)  | 0.16 (0.03)  | 0.22 (0.03)  | 0.21 (0.02)  | 0.25 (0.03)  |
| 20  | 200[M+](39) 159(100) 117(95)    | 1345                    | ND                | 1.11 (0.06)  | 1.08 (0.04)  | 0.98 (0.04)  | 1.01 (0.05)  | 1.13 (0.04)  | 1.06 (0.04)  |
| 21  | 202[M+](13) 81(100) 96(73)      | 1350                    | ND                | 0.12 (0.01)  | 0.10 (0.02)  | 0.13 (0.01)  | 0.15 (0.01)  | 0.09 (0.01)  | 0.07 (0.01)  |
| 22  | 204[M+](10) 119(100) 91(84)     | 1353                    | ND                | 0.09 (0.01)  | 0.06 (0.01)  | 0.03 (0.02)  | 0.02 (0.01)  | 0.10 (0.02)  | 0.05 (0.01)  |
| 23  | anastreptene                    | 1370 <sup>a</sup>       | 1370 <sup>a</sup> | 18.01 (0.05) | 18.06 (0.04) | 17.92 (0.04) | 17.99 (0.06) | 18.21 (0.05) | 18.05 (0.06) |
| 24  | 204[M+](5) 81(100) 93(96)       | 1384                    | ND                | 0.23 (0.01)  | 0.16 (0.02)  | 0.16 (0.03)  | 0.21 (0.02)  | 0.21 (0.01)  | 0.16 (0.04)  |
| 25  | β-elemene                       | 1391 <sup>a,b,c</sup>   | 1389 <sup>c</sup> | 2.73 (0.02)  | 2.79 (0.03)  | 2.74 (0.04)  | 2.69 (0.03)  | 2.85 (0.04)  | 2.82 (0.03)  |
| 26  | 204[M+](13) 157(100) 185(84)    | 1398                    | ND                | 0.33 (0.01)  | 0.26 (0.04)  | 0.19 (0.03)  | 0.31 (0.01)  | 0.33 (0.03)  | 0.34 (0.01)  |
| 27  | 204[M+](13) 157(100) 185(84)    | 1417                    | ND                | 0.37 (0.02)  | 0.18 (0.02)  | 0.25 (0.02)  | 0.35 (0.02)  | 0.19 (0.01)  | 0.25 (0.04)  |
| 28  | 204[M+](19) 135(100) 105(82)    | 1423                    | ND                | 0.14 (0.01)  | 0.27 (0.03)  | 0.16 (0.04)  | 0.32 (0.02)  | 0.21 (0.03)  | 0.14 (0.01)  |
| 29  | 204[M+](9) 91(100) 105(93)      | 1425                    | ND                | 0.04 (0.01)  | 0.07 (0.02)  | 0.02 (0.01)  | 0.01 (0.01)  | 0.05 (0.01)  | 0.08 (0.02)  |
| 30  | (-)-aristolene                  | 1429 <sup>a,b,c,d</sup> | 1428 <sup>a</sup> | 1.05 (0.03)  | 1.06 (0.04)  | 0.97 (0.03)  | 1.02 (0.05)  | 1.15 (0.02)  | 1.08 (0.03)  |
| 31  | 204[M+](9) 107(100) 79(43)      | 1432                    | ND                | 0.16 (0.02)  | 0.20 (0.03)  | 0.15 (0.02)  | 0.15 (0.02)  | 0.21 (0.02)  | 0.19 (0.04)  |
| 32  | γ-maaliene                      | 1435 <sup>a,b</sup>     | 1427 <sup>a</sup> | 0.51 (0.03)  | 0.51 (0.01)  | 0.48 (0.04)  | 0.47 (0.03)  | 0.48 (0.01)  | 0.45 (0.04)  |
| 33  | α-maaliene                      | 1443 <sup>a,b</sup>     | 1442 <sup>a</sup> | 0.36 (0.03)  | 0.35 (0.03)  | 0.33 (0.04)  | 0.31 (0.02)  | 0.29 (0.03)  | 0.38 (0.01)  |
| 34  | aromandendrene                  | 1445 <sup>a,b</sup>     | 1447 <sup>a</sup> | 3.33 (0.05)  | 3.12 (0.04)  | 3.22 (0.03)  | 3.24 (0.04)  | 3.05 (0.04)  | 3.11 (0.04)  |
| 35  | selina-5,11-diene               | 1447 <sup>a,b</sup>     | 1454 <sup>a</sup> | 0.42 (0.01)  | 0.61 (0.02)  | 0.44 (0.02)  | 0.41 (0.02)  | 0.62 (0.03)  | 0.64 (0.04)  |
| 36  | dehydroaromadendrene            | 1456 <sup>c</sup>       | 1460 <sup>c</sup> | 1.12 (0.05)  | 1.12 (0.03)  | 1.03 (0.03)  | 0.98 (0.05)  | 1.18 (0.04)  | 1.25 (0.05)  |
| 37  | 1,2,9,10-tetrahydroaristolane   | 1461                    | ND                | 0.45 (0.01)  | 0.41 (0.04)  | 0.39 (0.04)  | 0.41 (0.03)  | 0.47 (0.01)  | 0.48 (0.03)  |
| 38  | 204[M+](15) 91(100) 105(84)     | 1465                    | ND                | 0.36 (0.03)  | 0.29 (0.05)  | 0.29 (0.03)  | 0.29 (0.02)  | 0.45 (0.02)  | 0.53 (0.02)  |
| 39  | 204[M+](18) 128(100) 143(95)    | 1469                    | ND                | 0.34 (0.02)  | 0.35 (0.03)  | 0.33 (0.03)  | 0.33 (0.03)  | 0.33 (0.03)  | 0.36 (0.04)  |
| 40  | γ-gurjunene                     | 1474 <sup>c,d</sup>     | 1475 <sup>c</sup> | 0.51 (0.03)  | 0.51 (0.03)  | 0.41 (0.04)  | 0.43 (0.02)  | 0.53 (0.02)  | 0.57 (0.02)  |
| 41  | γ-murolene                      | 1477 <sup>c</sup>       | 1478 <sup>c</sup> | 0.12 (0.01)  | 0.18 (0.02)  | 0.15 (0.03)  | 0.19 (0.01)  | 0.21 (0.01)  | 0.23 (0.05)  |
| 42  | δ-selinene                      | 1488 <sup>c</sup>       | 1492 <sup>c</sup> | 1.39 (0.04)  | 1.55 (0.03)  | 1.32 (0.04)  | 1.42 (0.05)  | 1.42 (0.03)  | 1.31 (0.03)  |
| 43  | ledene                          | 1492 <sup>a,b,c</sup>   | 1496 <sup>c</sup> | 1.48 (0.03)  | 1.63 (0.04)  | 1.59 (0.03)  | 1.62 (0.05)  | 1.54 (0.04)  | 1.82 (0.03)  |
| 44  | 204[M+](38) 105(100) 93(96)     | 1495                    | ND                | 0.16 (0.01)  | 0.32 (0.06)  | 0.16 (0.02)  | 0.39 (0.03)  | 0.18 (0.02)  | 0.32 (0.02)  |
| 45  | bicyclogermacrene               | 1499 <sup>a,b,c</sup>   | 1500 <sup>c</sup> | 8.34 (0.03)  | 8.41 (0.05)  | 8.23 (0.05)  | 8.34 (0.05)  | 8.31 (0.04)  | 8.62 (0.05)  |
| 46  | 204[M+](19) 93(100) 91(95)      | 1505                    | ND                | 0.11 (0.02)  | 0.21 (0.02)  | 0.15 (0.01)  | 0.21 (0.01)  | 0.19 (0.02)  | 0.19 (0.03)  |
| 47  | 202[M+](25) 133(100) 91(89)     | 1509                    | ND                | 0.23 (0.02)  | 0.17 (0.01)  | 0.21 (0.03)  | 0.14 (0.02)  | 0.25 (0.01)  | 0.22 (0.02)  |
| 48  | 206[M+](14) 191(100) 57(38)     | 1514                    | ND                | 0.19 (0.01)  | 0.22 (0.02)  | 0.24 (0.03)  | 0.16 (0.03)  | 0.31 (0.03)  | 0.21 (0.03)  |
| 49  | 202[M+](33) 131(100) 145(53)    | 1518                    | ND                | 0.21 (0.03)  | 0.14 (0.04)  | 0.13 (0.02)  | 0.22 (0.02)  | 0.21 (0.02)  | 0.18 (0.01)  |
| 50  | δ-cadinene                      | 1524 <sup>a,b,c</sup>   | 1522 <sup>c</sup> | 0.34 (0.02)  | 0.32 (0.06)  | 0.29 (0.03)  | 0.34 (0.02)  | 0.28 (0.04)  | 0.32 (0.04)  |
| 51  | 204[M+](5) 91(100) 131(95)      | 1530                    | ND                | 0.07 (0.01)  | 0.09 (0.02)  | 0.10 (0.01)  | 0.12 (0.02)  | 0.11 (0.03)  | 0.11 (0.03)  |
| 52  | 200[M+](54) 185(100) 143(91)    | 1535                    | ND                | 0.19 (0.04)  | 0.15 (0.03)  | 0.13 (0.04)  | 0.15 (0.01)  | 0.10 (0.03)  | 0.09 (0.02)  |
| 53  | 4,5,9,10-dehydro-isolongifolene | 1544 <sup>a,b</sup>     | 1544 <sup>a</sup> | 6.14 (0.03)  | 6.24 (0.02)  | 6.23 (0.05)  | 6.31 (0.05)  | 5.99 (0.05)  | 6.37 (0.05)  |
| 54  | 202[M+](4) 128(100) 157(95)     | 1547                    | ND                | 0.70 (0.02)  | 0.69 (0.03)  | 0.71 (0.04)  | 0.69 (0.03)  | 0.71 (0.04)  | 0.68 (0.03)  |

|                              |                                               |                         |                   |              |              |              |              |              |              |
|------------------------------|-----------------------------------------------|-------------------------|-------------------|--------------|--------------|--------------|--------------|--------------|--------------|
| 55                           | 200[M+](8) 171(100) 186(79)                   | 1551                    | ND                | 0.25 (0.03)  | 0.10 (0.01)  | 0.25 (0.03)  | 0.22 (0.02)  | 0.32 (0.03)  | 0.15 (0.03)  |
| 56                           | 200[M+](91) 129(100) 157(88)                  | 1556                    | ND                | 0.10 (0.01)  | 0.06 (0.02)  | 0.12 (0.02)  | 0.10 (0.01)  | 0.12 (0.02)  | 0.16 (0.02)  |
| 57                           | 204[M+](8) 143(100) 157(98)                   | 1559                    | ND                | 0.03 (0.01)  | 0.09 (0.01)  | 0.03 (0.01)  | 0.06 (0.01)  | 0.10 (0.01)  | 0.12 (0.03)  |
| 58                           | 204[M+](82) 173(100) 189(94)                  | 1563                    | ND                | 1.39 (0.03)  | 1.42 (0.03)  | 1.42 (0.04)  | 1.39 (0.03)  | 1.39 (0.04)  | 1.42 (0.04)  |
| 59                           | palustrol                                     | 1567 <sup>c</sup>       | 1567 <sup>c</sup> | 8.24 (0.04)  | 8.17 (0.04)  | 8.35 (0.03)  | 8.22 (0.05)  | 8.13 (0.05)  | 8.14 (0.06)  |
| 60                           | 200[M+](11) 79(100) 93(95)                    | 1570                    | ND                | 0.48 (0.01)  | 0.83 (0.03)  | 0.79 (0.02)  | 0.72 (0.03)  | 0.71 (0.03)  | 0.53 (0.03)  |
| 61                           | 204[M+](31) 81(100) 109(88)                   | 1573                    | ND                | 2.13 (0.06)  | 2.06 (0.03)  | 2.21 (0.01)  | 1.92 (0.02)  | 1.98 (0.02)  | 1.91 (0.02)  |
| 62                           | spathulenol                                   | 1576 <sup>a,b,c</sup>   | 1577 <sup>c</sup> | 7.87 (0.05)  | 7.88 (0.04)  | 7.89 (0.05)  | 7.45 (0.04)  | 7.86 (0.05)  | 7.45 (0.05)  |
| 63                           | 200[M+](56) 185(100) 143(63)                  | 1581                    | ND                | 3.66 (0.05)  | 3.62 (0.03)  | 3.26 (0.03)  | 3.71 (0.03)  | 3.62 (0.03)  | 3.63 (0.03)  |
| 64                           | 202[M+](4) 91(100) 79(82)                     | 1587                    | ND                | 0.47 (0.03)  | 0.52 (0.03)  | 0.57 (0.04)  | 0.55 (0.02)  | 0.41 (0.01)  | 0.49 (0.02)  |
| 65                           | globulol                                      | 1599 <sup>a,b,c,d</sup> | 1590 <sup>c</sup> | 3.16 (0.03)  | 3.06 (0.02)  | 3.33 (0.02)  | 2.95 (0.02)  | 3.03 (0.03)  | 3.10 (0.03)  |
| 66                           | 200[M+](8) 198(100) 183(84)                   | 1605                    | ND                | 0.18 (0.02)  | 0.18 (0.03)  | 0.22 (0.03)  | 0.21 (0.04)  | 0.22 (0.02)  | 0.20 (0.02)  |
| 67                           | 220[M+](2) 145(100) 200(93)                   | 1609                    | ND                | 1.23 (0.02)  | 1.15 (0.03)  | 1.21 (0.02)  | 1.12 (0.04)  | 1.12 (0.02)  | 1.21 (0.05)  |
| 68                           | (+)-bisabola-2,10-diene[1,9]oxide             | 1615 <sup>a,b</sup>     | 1596 <sup>a</sup> | 0.24 (0.01)  | 0.12 (0.01)  | 0.16 (0.02)  | 0.09 (0.02)  | 0.21 (0.02)  | 0.22 (0.04)  |
| 69                           | 208[M+](3) 95(100) 85(95)                     | 1621                    | ND                | 0.79 (0.05)  | 0.63 (0.02)  | 0.92 (0.04)  | 0.76 (0.05)  | 0.71 (0.03)  | 0.83 (0.03)  |
| 70                           | ledene oxide-(II)                             | 1631 <sup>a,b</sup>     | 1631 <sup>a</sup> | 0.21 (0.02)  | 0.23 (0.02)  | 0.33 (0.02)  | 0.21 (0.03)  | 0.23 (0.01)  | 0.19 (0.04)  |
| 71                           | isospathulenol                                | 1635 <sup>a,b</sup>     | 1633 <sup>a</sup> | 0.63 (0.01)  | 0.55 (0.03)  | 0.58 (0.01)  | 0.65 (0.03)  | 0.62 (0.03)  | 0.56 (0.02)  |
| 72                           | 220[M+](18) 91(100) 105(83)                   | 1639                    | ND                | 1.62 (0.03)  | 1.92 (0.04)  | 2.01 (0.02)  | 1.91 (0.04)  | 1.93 (0.03)  | 2.01 (0.03)  |
| 73                           | cubenol                                       | 1642 <sup>a,b,c,d</sup> | 1645 <sup>c</sup> | 0.47 (0.01)  | 0.46 (0.02)  | 0.55 (0.03)  | 0.57 (0.02)  | 0.48 (0.02)  | 0.56 (0.04)  |
| 74                           | 220[M+](21) 91(100) 105(82)                   | 1651                    | ND                | 0.11 (0.01)  | 0.08 (0.01)  | 0.12 (0.02)  | 0.13 (0.01)  | 0.12 (0.01)  | 0.08 (0.03)  |
| 75                           | 222[M+](3) 179(100) 121(92)                   | 1655                    | ND                | 0.06 (0.02)  | 0.02 (0.01)  | 0.02 (0.01)  | 0.05 (0.01)  | 0.06 (0.01)  | 0.02 (0.01)  |
| 76                           | germacra-4(15),5,10(14)-trien-1- $\alpha$ -ol | 1660 <sup>c</sup>       | 1685 <sup>c</sup> | 0.54 (0.03)  | 0.59 (0.03)  | 0.59 (0.02)  | 0.61 (0.02)  | 0.64 (0.03)  | 0.66 (0.05)  |
| 77                           | 216[M+](31) 145(100) 91(97)                   | 1699                    | ND                | 0.43 (0.02)  | 0.44 (0.04)  | 0.41 (0.03)  | 0.42 (0.03)  | 0.52 (0.02)  | 0.44 (0.04)  |
| 78                           | 1,4-dimethyl-7-(1-methylethyl)-azulene        | 1790 <sup>c</sup>       | 1779 <sup>c</sup> | 2.69 (0.06)  | 2.71 (0.05)  | 2.72 (0.02)  | 2.73 (0.04)  | 2.69 (0.04)  | 2.73 (0.03)  |
| 79                           | 14-hydroxy- $\delta$ -cadinene                | 1797 <sup>c</sup>       | 1803 <sup>c</sup> | 0.42 (0.02)  | 0.26 (0.03)  | 0.31 (0.03)  | 0.29 (0.02)  | 0.33 (0.02)  | 0.26 (0.02)  |
| Total                        |                                               |                         |                   | 96.24 (1.96) | 96.22 (2.30) | 95.79 (2.08) | 95.81 (2.07) | 96.71 (2.00) | 96.93 (2.36) |
| % Identified                 |                                               |                         |                   | 77.97 (1.19) | 77.88 (1.37) | 77.55 (1.20) | 77.09 (1.26) | 77.81 (1.22) | 78.25 (1.43) |
| Including:                   |                                               |                         |                   |              |              |              |              |              |              |
| Aliphatics                   |                                               |                         |                   | 2.61 (0.25)  | 2.60 (0.28)  | 2.53 (0.20)  | 2.51 (0.17)  | 2.37 (0.19)  | 2.38 (0.20)  |
| Aromatics                    |                                               |                         |                   | 3.59 (0.12)  | 3.45 (0.20)  | 3.61 (0.10)  | 3.53 (0.13)  | 3.61 (0.16)  | 3.42 (0.17)  |
| Monoterpene hydrocarbons     |                                               |                         |                   | 0.03 (0.01)  | 0.02 (0.01)  | 0.02 (0.01)  | 0.06 (0.01)  | 0.02 (0.01)  | 0.03 (0.01)  |
| Monoterpenoid hydrocarbons   |                                               |                         |                   | 0.09 (0.02)  | 0.06 (0.01)  | 0.06 (0.03)  | 0.08 (0.01)  | 0.06 (0.01)  | 0.09 (0.02)  |
| Sesquiterpene hydrocarbons   |                                               |                         |                   | 49.87 (0.58) | 50.43 (0.63) | 49.24 (0.63) | 49.87 (0.69) | 50.22 (0.59) | 51.19 (0.68) |
| Sesquiterpenoid hydrocarbons |                                               |                         |                   | 21.78 (0.22) | 21.32 (0.24) | 22.09 (0.23) | 21.04 (0.25) | 21.53 (0.26) | 21.14 (0.35) |

- less than 0.01%. \* The names of terpenes and terpenoids according to IUPAC terminology are given in Table S5. \*\* Retention index on Quadex 007-5MS column. \*\*\* Literature retention index. ND No data. \*\*\*\* For abbreviations of samples see Table 1. ( ) standard deviation. Identification of compounds by MS databases (<sup>a</sup> - NIST 2011, <sup>b</sup> - NIST Chemistry WebBook, <sup>c</sup> - Adams 4 Library, <sup>d</sup> - Pherobase).

**Table S2b.** Volatile compounds detected in the samples collected in spring (CI-45 – CI-50).

| No. | Compounds*                      | RI**                    | RI***             | Code****     |              |              |              |              |              |
|-----|---------------------------------|-------------------------|-------------------|--------------|--------------|--------------|--------------|--------------|--------------|
|     |                                 |                         |                   | CI-45        | CI-46        | CI-47        | CI-48        | CI-49        | CI-50        |
| 1   | propan-1-ol                     | <700 <sup>a,b</sup>     | 483 <sup>a</sup>  | 1.13 (0.03)  | 1.08 (0.04)  | 1.05 (0.03)  | 1.13 (0.03)  | 1.13 (0.02)  | 1.01 (0.02)  |
| 2   | pentanal                        | 705 <sup>a,b,c,d</sup>  | 704 <sup>c</sup>  | 0.41 (0.03)  | 0.29 (0.02)  | 0.29 (0.02)  | 0.35 (0.02)  | 0.41 (0.03)  | 0.27 (0.02)  |
| 3   | hexanal                         | 802 <sup>a,b,c,d</sup>  | 801 <sup>c</sup>  | 0.23 (0.04)  | 0.17 (0.04)  | 0.20 (0.04)  | 0.22 (0.03)  | 0.18 (0.02)  | 0.19 (0.03)  |
| 4   | hexan-1-ol                      | 867 <sup>a,b</sup>      | 869 <sup>a</sup>  | 0.48 (0.03)  | 0.49 (0.03)  | 0.44 (0.03)  | 0.54 (0.02)  | 0.47 (0.03)  | 0.52 (0.02)  |
| 5   | heptanal                        | 902 <sup>a,b,c,d</sup>  | 901 <sup>c</sup>  | 0.09 (0.01)  | 0.07 (0.01)  | 0.08 (0.01)  | 0.03 (0.01)  | 0.06 (0.01)  | 0.06 (0.01)  |
| 6   | α-pinene                        | 939 <sup>a,b,c</sup>    | 932 <sup>c</sup>  | 0.06 (0.01)  | 0.03 (0.01)  | 0.04 (0.01)  | 0.03 (0.01)  | 0.01 (0.01)  | 0.05 (0.01)  |
| 7   | benzaldehyde                    | 940 <sup>a,b,c</sup>    | 952 <sup>c</sup>  | 0.13 (0.02)  | 0.22 (0.04)  | 0.21 (0.02)  | 0.29 (0.01)  | 0.15 (0.02)  | 0.26 (0.03)  |
| 8   | 2-ethylhexan-1-ol               | 1023 <sup>a,b</sup>     | 1025 <sup>a</sup> | 0.06 (0.03)  | 0.15 (0.01)  | 0.15 (0.01)  | 0.08 (0.02)  | 0.07 (0.03)  | 0.05 (0.01)  |
| 9   | phenylmethanol                  | 1028 <sup>a,b,c</sup>   | 1026 <sup>c</sup> | 1.06 (0.05)  | 1.16 (0.04)  | 1.23 (0.03)  | 1.05 (0.04)  | 1.05 (0.03)  | 1.13 (0.04)  |
| 10  | phenylacetaldehyde              | 1044 <sup>a,b</sup>     | 1044 <sup>a</sup> | 1.33 (0.03)  | 1.17 (0.04)  | 1.00 (0.04)  | 1.09 (0.04)  | 1.20 (0.04)  | 1.11 (0.03)  |
| 11  | nonanal                         | 1102 <sup>a,b,c,d</sup> | 1100 <sup>c</sup> | 0.08 (0.01)  | 0.08 (0.02)  | 0.17 (0.01)  | 0.16 (0.03)  | 0.15 (0.03)  | 0.12 (0.01)  |
| 12  | 3,4-dimethylcyclohexan-1-ol     | 1115 <sup>a,b</sup>     | 1126 <sup>a</sup> | 0.07 (0.01)  | 0.13 (0.03)  | 0.11 (0.03)  | 0.15 (0.02)  | 0.12 (0.02)  | 0.08 (0.01)  |
| 13  | phenylethanol                   | 1121 <sup>a,b</sup>     | 1121 <sup>a</sup> | 0.09 (0.03)  | 0.12 (0.04)  | 0.15 (0.03)  | 0.15 (0.01)  | 0.11 (0.01)  | 0.13 (0.03)  |
| 14  | decanal                         | 1195 <sup>a,b,c,d</sup> | 1201 <sup>c</sup> | 0.10 (0.03)  | 0.09 (0.02)  | 0.07 (0.02)  | 0.03 (0.01)  | 0.07 (0.02)  | 0.12 (0.03)  |
| 15  | β-cyclocitral                   | 1221 <sup>c</sup>       | 1217 <sup>c</sup> | 0.05 (0.01)  | 0.10 (0.01)  | 0.09 (0.01)  | 0.12 (0.03)  | 0.06 (0.01)  | 0.07 (0.02)  |
| 16  | 2-phenoxyethan-1-ol             | 1225 <sup>a,b</sup>     | 1226 <sup>a</sup> | 0.91 (0.04)  | 0.96 (0.05)  | 1.01 (0.05)  | 1.03 (0.05)  | 0.91 (0.03)  | 0.96 (0.04)  |
| 17  | bicycloelemene                  | 1316 <sup>a</sup>       | 1330 <sup>a</sup> | 0.15 (0.02)  | 0.19 (0.04)  | 0.15 (0.01)  | 0.11 (0.01)  | 0.14 (0.02)  | 0.12 (0.02)  |
| 18  | δ-elemene                       | 1324 <sup>a,b,c</sup>   | 1335 <sup>c</sup> | 0.81 (0.02)  | 0.81 (0.05)  | 0.77 (0.03)  | 0.73 (0.05)  | 0.72 (0.03)  | 0.66 (0.03)  |
| 19  | 204[M+](5) 121(100) 93(89)      | 1343                    | ND                | 0.14 (0.03)  | 0.17 (0.02)  | 0.25 (0.04)  | 0.26 (0.04)  | 0.17 (0.03)  | 0.15 (0.01)  |
| 20  | 200[M+](39) 159(100) 117(95)    | 1345                    | ND                | 1.13 (0.04)  | 1.21 (0.03)  | 0.99 (0.03)  | 1.04 (0.03)  | 1.06 (0.04)  | 0.99 (0.02)  |
| 21  | 202[M+](13) 81(100) 96(73)      | 1350                    | ND                | 0.11 (0.01)  | 0.16 (0.05)  | 0.17 (0.01)  | 0.18 (0.02)  | 0.16 (0.02)  | 0.11 (0.01)  |
| 22  | 204[M+](10) 119(100) 91(84)     | 1353                    | ND                | 0.05 (0.01)  | 0.10 (0.01)  | 0.08 (0.01)  | 0.05 (0.01)  | 0.02 (0.01)  | 0.09 (0.01)  |
| 23  | anastreptene                    | 1370 <sup>a</sup>       | 1370 <sup>a</sup> | 18.16 (0.07) | 17.98 (0.06) | 17.92 (0.07) | 18.25 (0.05) | 17.96 (0.05) | 18.12 (0.06) |
| 24  | 204[M+](5) 81(100) 93(96)       | 1384                    | ND                | 0.24 (0.03)  | 0.16 (0.03)  | 0.26 (0.03)  | 0.32 (0.02)  | 0.18 (0.02)  | 0.22 (0.03)  |
| 25  | β-elemene                       | 1391 <sup>a,b,c</sup>   | 1389 <sup>c</sup> | 2.69 (0.03)  | 2.89 (0.05)  | 2.82 (0.04)  | 2.86 (0.04)  | 2.69 (0.04)  | 2.79 (0.04)  |
| 26  | 204[M+](13) 157(100) 185(84)    | 1398                    | ND                | 0.21 (0.02)  | 0.31 (0.04)  | 0.36 (0.01)  | 0.32 (0.03)  | 0.43 (0.03)  | 0.23 (0.03)  |
| 27  | 204[M+](13) 157(100) 185(84)    | 1417                    | ND                | 0.18 (0.01)  | 0.28 (0.03)  | 0.29 (0.03)  | 0.34 (0.03)  | 0.45 (0.04)  | 0.28 (0.03)  |
| 28  | 204[M+](19) 135(100) 105(82)    | 1423                    | ND                | 0.19 (0.01)  | 0.19 (0.05)  | 0.28 (0.04)  | 0.15 (0.03)  | 0.24 (0.03)  | 0.25 (0.04)  |
| 29  | 204[M+](9) 91(100) 105(93)      | 1425                    | ND                | 0.08 (0.02)  | 0.05 (0.01)  | 0.05 (0.01)  | 0.08 (0.01)  | 0.09 (0.03)  | 0.03 (0.01)  |
| 30  | (-)-aristolene                  | 1429 <sup>a,b,c,d</sup> | 1428 <sup>a</sup> | 0.93 (0.04)  | 0.96 (0.05)  | 1.02 (0.02)  | 1.06 (0.05)  | 1.10 (0.06)  | 1.13 (0.03)  |
| 31  | 204[M+](9) 107(100) 79(43)      | 1432                    | ND                | 0.15 (0.03)  | 0.19 (0.05)  | 0.23 (0.03)  | 0.25 (0.02)  | 0.11 (0.02)  | 0.15 (0.02)  |
| 32  | γ-maaliene                      | 1435 <sup>a,b</sup>     | 1427 <sup>a</sup> | 0.44 (0.05)  | 0.52 (0.04)  | 0.54 (0.02)  | 0.57 (0.03)  | 0.62 (0.04)  | 0.53 (0.04)  |
| 33  | α-maaliene                      | 1443 <sup>a,b</sup>     | 1442 <sup>a</sup> | 0.32 (0.03)  | 0.31 (0.04)  | 0.29 (0.01)  | 0.34 (0.04)  | 0.34 (0.04)  | 0.34 (0.02)  |
| 34  | aromandendrene                  | 1445 <sup>a,b</sup>     | 1447 <sup>a</sup> | 2.98 (0.04)  | 3.33 (0.05)  | 3.13 (0.03)  | 3.12 (0.05)  | 3.39 (0.05)  | 3.31 (0.04)  |
| 35  | selina-5,11-diene               | 1447 <sup>a,b</sup>     | 1454 <sup>a</sup> | 0.52 (0.02)  | 0.53 (0.02)  | 0.56 (0.02)  | 0.61 (0.02)  | 0.74 (0.04)  | 0.55 (0.05)  |
| 36  | dehydroaromadendrene            | 1456 <sup>c</sup>       | 1460 <sup>c</sup> | 1.16 (0.06)  | 1.11 (0.03)  | 1.25 (0.03)  | 1.18 (0.04)  | 1.23 (0.02)  | 1.03 (0.02)  |
| 37  | 1,2,9,10-tetrahydroaristolane   | 1461                    | ND                | 0.39 (0.04)  | 0.42 (0.05)  | 0.44 (0.02)  | 0.43 (0.06)  | 0.47 (0.02)  | 0.55 (0.03)  |
| 38  | 204[M+](15) 91(100) 105(84)     | 1465                    | ND                | 0.47 (0.03)  | 0.51 (0.05)  | 0.31 (0.03)  | 0.25 (0.03)  | 0.22 (0.02)  | 0.30 (0.02)  |
| 39  | 204[M+](18) 128(100) 143(95)    | 1469                    | ND                | 0.32 (0.05)  | 0.32 (0.03)  | 0.29 (0.02)  | 0.32 (0.04)  | 0.34 (0.01)  | 0.32 (0.02)  |
| 40  | γ-gurjunene                     | 1474 <sup>c,d</sup>     | 1475 <sup>c</sup> | 0.47 (0.02)  | 0.37 (0.03)  | 0.57 (0.03)  | 0.52 (0.02)  | 0.48 (0.04)  | 0.51 (0.02)  |
| 41  | γ-murolene                      | 1477 <sup>c</sup>       | 1478 <sup>c</sup> | 0.13 (0.01)  | 0.13 (0.02)  | 0.11 (0.01)  | 0.22 (0.03)  | 0.21 (0.03)  | 0.18 (0.01)  |
| 42  | δ-selinene                      | 1488 <sup>c</sup>       | 1492 <sup>c</sup> | 1.26 (0.03)  | 1.49 (0.04)  | 1.63 (0.02)  | 1.52 (0.04)  | 1.53 (0.04)  | 1.53 (0.05)  |
| 43  | ledene                          | 1492 <sup>a,b,c</sup>   | 1496 <sup>c</sup> | 1.76 (0.02)  | 1.65 (0.03)  | 1.58 (0.04)  | 1.63 (0.03)  | 1.49 (0.03)  | 1.59 (0.04)  |
| 44  | 204[M+](38) 105(100) 93(96)     | 1495                    | ND                | 0.35 (0.03)  | 0.32 (0.02)  | 0.29 (0.03)  | 0.33 (0.03)  | 0.34 (0.03)  | 0.25 (0.03)  |
| 45  | bicyclogermacrene               | 1499 <sup>a,b,c</sup>   | 1500 <sup>c</sup> | 8.44 (0.05)  | 8.35 (0.05)  | 8.55 (0.05)  | 8.31 (0.05)  | 8.31 (0.05)  | 8.37 (0.06)  |
| 46  | 204[M+](19) 93(100) 91(95)      | 1505                    | ND                | 0.19 (0.02)  | 0.16 (0.01)  | 0.15 (0.02)  | 0.18 (0.03)  | 0.21 (0.03)  | 0.15 (0.02)  |
| 47  | 202[M+](25) 133(100) 91(89)     | 1509                    | ND                | 0.17 (0.03)  | 0.15 (0.02)  | 0.27 (0.03)  | 0.29 (0.03)  | 0.14 (0.04)  | 0.27 (0.03)  |
| 48  | 206[M+](14) 191(100) 57(38)     | 1514                    | ND                | 0.24 (0.02)  | 0.25 (0.03)  | 0.21 (0.05)  | 0.18 (0.04)  | 0.23 (0.02)  | 0.22 (0.01)  |
| 49  | 202[M+](33) 131(100) 145(53)    | 1518                    | ND                | 0.18 (0.04)  | 0.23 (0.04)  | 0.25 (0.02)  | 0.23 (0.03)  | 0.26 (0.02)  | 0.19 (0.03)  |
| 50  | δ-cadinene                      | 1524 <sup>a,b,c</sup>   | 1522 <sup>c</sup> | 0.31 (0.03)  | 0.34 (0.02)  | 0.34 (0.03)  | 0.19 (0.03)  | 0.27 (0.03)  | 0.34 (0.04)  |
| 51  | 204[M+](5) 91(100) 131(95)      | 1530                    | ND                | 0.10 (0.02)  | 0.08 (0.01)  | 0.07 (0.04)  | 0.15 (0.01)  | 0.14 (0.02)  | 0.16 (0.02)  |
| 52  | 200[M+](54) 185(100) 143(91)    | 1535                    | ND                | 0.12 (0.01)  | 0.16 (0.02)  | 0.23 (0.03)  | 0.13 (0.02)  | 0.13 (0.03)  | 0.18 (0.03)  |
| 53  | 4,5,9,10-dehydro-isolongifolene | 1544 <sup>a,b</sup>     | 1544 <sup>a</sup> | 6.31 (0.06)  | 6.28 (0.07)  | 6.23 (0.05)  | 6.39 (0.07)  | 6.42 (0.05)  | 6.27 (0.06)  |
| 54  | 202[M+](4) 128(100) 157(95)     | 1547                    | ND                | 0.68 (0.03)  | 0.63 (0.04)  | 0.69 (0.03)  | 0.71 (0.05)  | 0.77 (0.04)  | 0.63 (0.04)  |



|                              |                                               |                         |                   |              |              |              |              |              |              |
|------------------------------|-----------------------------------------------|-------------------------|-------------------|--------------|--------------|--------------|--------------|--------------|--------------|
| 55                           | 200[M+](8) 171(100) 186(79)                   | 1551                    | ND                | 0.19 (0.02)  | 0.19 (0.02)  | 0.25 (0.03)  | 0.18 (0.03)  | 0.18 (0.03)  | 0.22 (0.02)  |
| 56                           | 200[M+](91) 129(100) 157(88)                  | 1556                    | ND                | 0.15 (0.02)  | 0.13 (0.03)  | 0.09 (0.01)  | 0.05 (0.02)  | 0.03 (0.01)  | 0.08 (0.02)  |
| 57                           | 204[M+](8) 143(100) 157(98)                   | 1559                    | ND                | 0.11 (0.01)  | 0.05 (0.01)  | 0.08 (0.01)  | 0.10 (0.02)  | 0.12 (0.04)  | 0.15 (0.03)  |
| 58                           | 204[M+](82) 173(100) 189(94)                  | 1563                    | ND                | 1.36 (0.04)  | 1.38 (0.05)  | 1.52 (0.04)  | 1.34 (0.04)  | 1.52 (0.03)  | 1.53 (0.05)  |
| 59                           | palustrol                                     | 1567 <sup>c</sup>       | 1567 <sup>c</sup> | 8.29 (0.02)  | 8.44 (0.07)  | 8.46 (0.06)  | 8.42 (0.06)  | 8.33 (0.05)  | 8.33 (0.06)  |
| 60                           | 200[M+](11) 79(100) 93(95)                    | 1570                    | ND                | 0.86 (0.05)  | 0.77 (0.04)  | 0.76 (0.02)  | 0.52 (0.03)  | 0.57 (0.03)  | 0.91 (0.04)  |
| 61                           | 204[M+](31) 81(100) 109(88)                   | 1573                    | ND                | 2.03 (0.03)  | 2.12 (0.04)  | 2.03 (0.04)  | 2.03 (0.05)  | 2.13 (0.05)  | 2.13 (0.03)  |
| 62                           | spathulenol                                   | 1576 <sup>a,b,c</sup>   | 1577 <sup>c</sup> | 7.58 (0.05)  | 7.83 (0.05)  | 7.69 (0.07)  | 7.70 (0.03)  | 7.31 (0.03)  | 7.58 (0.05)  |
| 63                           | 200[M+](56) 185(100) 143(63)                  | 1581                    | ND                | 3.69 (0.03)  | 3.52 (0.03)  | 3.73 (0.04)  | 3.62 (0.04)  | 3.48 (0.04)  | 3.72 (0.04)  |
| 64                           | 202[M+](4) 91(100) 79(82)                     | 1587                    | ND                | 0.55 (0.04)  | 0.43 (0.02)  | 0.41 (0.03)  | 0.54 (0.01)  | 0.52 (0.02)  | 0.52 (0.02)  |
| 65                           | globulol                                      | 1599 <sup>a,b,c,d</sup> | 1590 <sup>c</sup> | 3.01 (0.05)  | 3.12 (0.04)  | 2.79 (0.04)  | 2.92 (0.04)  | 2.99 (0.04)  | 3.16 (0.04)  |
| 66                           | 200[M+](8) 198(100) 183(84)                   | 1605                    | ND                | 0.24 (0.02)  | 0.33 (0.06)  | 0.22 (0.03)  | 0.18 (0.02)  | 0.26 (0.03)  | 0.32 (0.02)  |
| 67                           | 220[M+](2) 145(100) 200(93)                   | 1609                    | ND                | 1.23 (0.03)  | 1.16 (0.04)  | 1.32 (0.04)  | 1.33 (0.02)  | 1.23 (0.03)  | 1.34 (0.04)  |
| 68                           | (+)-bisabola-2,10-diene[1,9]oxide             | 1615 <sup>a,b</sup>     | 1596 <sup>a</sup> | 0.19 (0.04)  | 0.26 (0.03)  | 0.14 (0.02)  | 0.16 (0.03)  | 0.17 (0.03)  | 0.22 (0.02)  |
| 69                           | 208[M+](3) 95(100) 85(95)                     | 1621                    | ND                | 0.79 (0.03)  | 0.81 (0.06)  | 0.73 (0.03)  | 0.67 (0.05)  | 0.72 (0.05)  | 0.76 (0.04)  |
| 70                           | ledene oxide-(II)                             | 1631 <sup>a,b</sup>     | 1631 <sup>a</sup> | 0.26 (0.02)  | 0.21 (0.03)  | 0.23 (0.02)  | 0.25 (0.04)  | 0.26 (0.03)  | 0.34 (0.03)  |
| 71                           | isospathulenol                                | 1635 <sup>a,b</sup>     | 1633 <sup>a</sup> | 0.63 (0.04)  | 0.52 (0.03)  | 0.52 (0.04)  | 0.51 (0.05)  | 0.66 (0.05)  | 0.61 (0.04)  |
| 72                           | 220[M+](18) 91(100) 105(83)                   | 1639                    | ND                | 1.99 (0.05)  | 1.66 (0.04)  | 1.76 (0.05)  | 1.86 (0.04)  | 2.04 (0.03)  | 1.99 (0.05)  |
| 73                           | cubenol                                       | 1642 <sup>a,b,c,d</sup> | 1645 <sup>c</sup> | 0.47 (0.04)  | 0.40 (0.03)  | 0.43 (0.03)  | 0.42 (0.02)  | 0.52 (0.03)  | 0.43 (0.04)  |
| 74                           | 220[M+](21) 91(100) 105(82)                   | 1651                    | ND                | 0.08 (0.03)  | 0.07 (0.02)  | 0.14 (0.02)  | 0.10 (0.03)  | 0.13 (0.02)  | 0.11 (0.02)  |
| 75                           | 222[M+](3) 179(100) 121(92)                   | 1655                    | ND                | 0.09 (0.01)  | 0.03 (0.01)  | 0.02 (0.01)  | 0.03 (0.01)  | 0.02 (0.01)  | 0.05 (0.01)  |
| 76                           | germacra-4(15),5,10(14)-trien-1- $\alpha$ -ol | 1660 <sup>c</sup>       | 1685 <sup>c</sup> | 0.51 (0.02)  | 0.53 (0.04)  | 0.59 (0.02)  | 0.58 (0.04)  | 0.58 (0.02)  | 0.62 (0.04)  |
| 77                           | 216[M+](31) 145(100) 91(97)                   | 1699                    | ND                | 0.42 (0.06)  | 0.47 (0.04)  | 0.54 (0.02)  | 0.41 (0.03)  | 0.47 (0.03)  | 0.42 (0.02)  |
| 78                           | 1,4-dimethyl-7-(1-methylethyl)-azulene        | 1790 <sup>c</sup>       | 1779 <sup>c</sup> | 2.73 (0.02)  | 2.63 (0.06)  | 2.76 (0.03)  | 2.62 (0.05)  | 2.53 (0.02)  | 2.75 (0.04)  |
| 79                           | 14-hydroxy- $\delta$ -cadinene                | 1797 <sup>c</sup>       | 1803 <sup>c</sup> | 0.24 (0.01)  | 0.35 (0.03)  | 0.40 (0.02)  | 0.43 (0.02)  | 0.41 (0.05)  | 0.36 (0.03)  |
| Total                        |                                               |                         |                   | 96.50 (2.32) | 97.01 (2.70) | 97.52 (2.23) | 97.22 (2.46) | 97.13 (2.37) | 97.87 (2.32) |
| % Identified                 |                                               |                         |                   | 77.42 (1.36) | 78.26 (1.60) | 78.20 (1.27) | 78.50 (1.47) | 78.02 (1.39) | 78.45 (1.41) |
| Including:                   |                                               |                         |                   |              |              |              |              |              |              |
| Aliphatics                   |                                               |                         |                   | 2.65 (0.22)  | 2.55 (0.22)  | 2.56 (0.20)  | 2.69 (0.19)  | 2.66 (0.21)  | 2.42 (0.16)  |
| Aromatics                    |                                               |                         |                   | 3.52 (0.17)  | 3.63 (0.21)  | 3.60 (0.17)  | 3.61 (0.15)  | 3.42 (0.13)  | 3.59 (0.17)  |
| Monoterpene hydrocarbons     |                                               |                         |                   | 0.06 (0.01)  | 0.03 (0.01)  | 0.04 (0.01)  | 0.03 (0.01)  | 0.01 (0.01)  | 0.05 (0.01)  |
| Monoterpenoid hydrocarbons   |                                               |                         |                   | 0.05 (0.01)  | 0.10 (0.01)  | 0.09 (0.01)  | 0.12 (0.03)  | 0.06 (0.01)  | 0.07 (0.02)  |
| Sesquiterpene hydrocarbons   |                                               |                         |                   | 49.96 (0.66) | 50.29 (0.80) | 50.66 (0.56) | 50.66 (0.76) | 50.64 (0.70) | 50.67 (0.70) |
| Sesquiterpenoid hydrocarbons |                                               |                         |                   | 21.18 (0.29) | 21.66 (0.35) | 21.25 (0.32) | 21.39 (0.33) | 21.23 (0.33) | 21.65 (0.35) |

- less than 0.01%. \* The names of terpenes and terpenoids according to IUPAC terminology are given in Table S5. \*\* Retention index on Quadex 007-5MS column. \*\*\* Literature retention index. ND No data. \*\*\*\* For abbreviations of samples see Table 1. ( ) standard deviation. Identification of compounds by MS databases (<sup>a</sup> - NIST 2011, <sup>b</sup> - NIST Chemistry WebBook, <sup>c</sup> - Adams 4 Library, <sup>d</sup> - Pherobase).

**Table S3a.** Volatile compounds detected in the samples collected in summer (CI-51 – CI-56).

| No. | Compounds*                      | RI**                    | RI***             | Code****     |              |              |              |              |              |
|-----|---------------------------------|-------------------------|-------------------|--------------|--------------|--------------|--------------|--------------|--------------|
|     |                                 |                         |                   | CI-51        | CI-52        | CI-53        | CI-54        | CI-55        | CI-56        |
| 1   | propan-1-ol                     | <700 <sup>a,b</sup>     | 483 <sup>a</sup>  | 0.41 (0.02)  | 0.43 (0.03)  | 0.41 (0.03)  | 0.44 (0.03)  | 0.32 (0.03)  | 0.28 (0.03)  |
| 2   | pentanal                        | 705 <sup>a,b,c,d</sup>  | 704 <sup>c</sup>  | 0.35 (0.03)  | 0.29 (0.03)  | 0.32 (0.02)  | 0.29 (0.02)  | 0.34 (0.03)  | 0.31 (0.01)  |
| 3   | hexanal                         | 802 <sup>a,b,c,d</sup>  | 801 <sup>c</sup>  | 0.10 (0.03)  | 0.06 (0.01)  | 0.05 (0.01)  | 0.11 (0.01)  | 0.07 (0.01)  | 0.06 (0.02)  |
| 4   | hexan-1-ol                      | 867 <sup>a,b</sup>      | 869 <sup>a</sup>  | 0.35 (0.03)  | 0.35 (0.02)  | 0.31 (0.02)  | 0.29 (0.02)  | 0.33 (0.02)  | 0.32 (0.02)  |
| 5   | heptanal                        | 902 <sup>a,b,c,d</sup>  | 901 <sup>c</sup>  | 0.06 (0.02)  | 0.05 (0.01)  | 0.04 (0.01)  | 0.04 (0.01)  | 0.04 (0.01)  | 0.06 (0.01)  |
| 6   | α-pinene                        | 939 <sup>a,b,c</sup>    | 932 <sup>c</sup>  | 0.03 (0.01)  | 0.03 (0.01)  | 0.02 (0.01)  | 0.03 (0.01)  | 0.03 (0.01)  | 0.02 (0.01)  |
| 7   | benzaldehyde                    | 940 <sup>a,b,c</sup>    | 952 <sup>c</sup>  | 0.12 (0.03)  | 0.08 (0.01)  | 0.08 (0.02)  | 0.11 (0.02)  | 0.08 (0.02)  | 0.09 (0.01)  |
| 8   | 2-ethylhexan-1-ol               | 1023 <sup>a,b</sup>     | 1025 <sup>a</sup> | 0.05 (0.01)  | 0.05 (0.01)  | 0.03 (0.01)  | 0.02 (0.01)  | 0.05 (0.02)  | 0.06 (0.01)  |
| 9   | phenylmethanol                  | 1028 <sup>a,b,c</sup>   | 1026 <sup>c</sup> | 1.07 (0.03)  | 1.12 (0.04)  | 0.95 (0.03)  | 1.01 (0.03)  | 1.12 (0.02)  | 1.05 (0.03)  |
| 10  | phenylacetaldehyde              | 1044 <sup>a,b</sup>     | 1044 <sup>a</sup> | 0.23 (0.02)  | 0.19 (0.03)  | 0.22 (0.02)  | 0.20 (0.02)  | 0.20 (0.01)  | 0.23 (0.02)  |
| 11  | nonanal                         | 1102 <sup>a,b,c,d</sup> | 1100 <sup>c</sup> | 0.03 (0.01)  | 0.03 (0.01)  | 0.01 (0.01)  | 0.01 (0.01)  | 0.03 (0.01)  | 0.04 (0.01)  |
| 12  | 3,4-dimethylcyclohexan-1-ol     | 1115 <sup>a,b</sup>     | 1126 <sup>a</sup> | 0.04 (0.01)  | 0.01 (0.01)  | 0.03 (0.01)  | 0.02 (0.01)  | 0.01 (0.01)  | 0.03 (0.01)  |
| 13  | phenylethanol                   | 1121 <sup>a,b</sup>     | 1121 <sup>a</sup> | 0.72 (0.04)  | 0.72 (0.04)  | 0.65 (0.04)  | 0.71 (0.03)  | 0.65 (0.03)  | 0.72 (0.05)  |
| 14  | decanal                         | 1195 <sup>a,b,c,d</sup> | 1201 <sup>c</sup> | 0.03 (0.01)  | 0.03 (0.01)  | 0.01 (0.01)  | 0.02 (0.01)  | 0.03 (0.01)  | 0.06 (0.01)  |
| 15  | β-cyclocitral                   | 1221 <sup>c</sup>       | 1217 <sup>c</sup> | 0.05 (0.01)  | 0.04 (0.01)  | 0.04 (0.01)  | 0.03 (0.01)  | 0.06 (0.01)  | 0.02 (0.01)  |
| 16  | 2-phenoxyethan-1-ol             | 1225 <sup>a,b</sup>     | 1226 <sup>a</sup> | 0.43 (0.02)  | 0.39 (0.04)  | 0.39 (0.04)  | 0.39 (0.04)  | 0.36 (0.04)  | 0.04 (0.03)  |
| 17  | bicycloelemene                  | 1316 <sup>a</sup>       | 1330 <sup>a</sup> | 0.09 (0.01)  | 0.11 (0.02)  | 0.09 (0.03)  | 0.07 (0.03)  | 0.07 (0.02)  | 0.07 (0.01)  |
| 18  | δ-elemene                       | 1324 <sup>a,b,c</sup>   | 1335 <sup>c</sup> | 1.33 (0.05)  | 2.23 (0.03)  | 1.92 (0.02)  | 1.91 (0.04)  | 2.05 (0.05)  | 2.06 (0.06)  |
| 19  | 204[M+](5) 121(100) 93(89)      | 1343                    | ND                | 0.42 (0.03)  | 0.42 (0.02)  | 0.39 (0.02)  | 0.43 (0.03)  | 0.49 (0.02)  | 0.49 (0.02)  |
| 20  | 200[M+](39) 159(100) 117(95)    | 1345                    | ND                | 0.92 (0.05)  | 0.53 (0.03)  | 0.65 (0.03)  | 0.59 (0.03)  | 0.93 (0.03)  | 0.71 (0.03)  |
| 21  | 202[M+](13) 81(100) 96(73)      | 1350                    | ND                | 0.18 (0.01)  | 0.23 (0.02)  | 0.19 (0.04)  | 0.23 (0.02)  | 0.23 (0.02)  | 0.25 (0.02)  |
| 22  | 204[M+](10) 119(100) 91(84)     | 1353                    | ND                | 0.08 (0.01)  | 0.05 (0.01)  | 0.06 (0.01)  | 0.07 (0.02)  | 0.04 (0.01)  | 0.06 (0.03)  |
| 23  | anastreptene                    | 1370 <sup>a</sup>       | 1370 <sup>a</sup> | 25.13 (0.05) | 25.06 (0.05) | 25.09 (0.06) | 25.37 (0.06) | 25.13 (0.06) | 25.24 (0.06) |
| 24  | 204[M+](5) 81(100) 93(96)       | 1384                    | ND                | 0.16 (0.05)  | 0.15 (0.04)  | 0.11 (0.02)  | 0.14 (0.02)  | 0.16 (0.02)  | 0.18 (0.04)  |
| 25  | β-elemene                       | 1391 <sup>a,b,c</sup>   | 1389 <sup>c</sup> | 2.62 (0.03)  | 1.92 (0.03)  | 2.03 (0.03)  | 2.01 (0.04)  | 2.42 (0.03)  | 2.49 (0.03)  |
| 26  | 204[M+](13) 157(100) 185(84)    | 1398                    | ND                | 0.33 (0.02)  | 0.17 (0.02)  | 0.21 (0.02)  | 0.20 (0.03)  | 0.24 (0.02)  | 0.26 (0.01)  |
| 27  | 204[M+](13) 157(100) 185(84)    | 1417                    | ND                | 0.24 (0.03)  | 0.31 (0.02)  | 0.18 (0.02)  | 0.25 (0.03)  | 0.27 (0.02)  | 0.28 (0.02)  |
| 28  | 204[M+](19) 135(100) 105(82)    | 1423                    | ND                | 0.25 (0.01)  | 0.28 (0.03)  | 0.34 (0.02)  | 0.23 (0.03)  | 0.22 (0.03)  | 0.26 (0.02)  |
| 29  | 204[M+](9) 91(100) 105(93)      | 1425                    | ND                | 0.09 (0.01)  | 0.09 (0.01)  | 0.07 (0.01)  | 0.09 (0.02)  | 0.10 (0.01)  | 0.12 (0.04)  |
| 30  | (-)-aristolene                  | 1429 <sup>a,b,c,d</sup> | 1428 <sup>a</sup> | 0.72 (0.03)  | 0.73 (0.04)  | 0.77 (0.03)  | 0.69 (0.04)  | 0.73 (0.03)  | 0.68 (0.03)  |
| 31  | 204[M+](9) 107(100) 79(43)      | 1432                    | ND                | 0.22 (0.04)  | 0.32 (0.03)  | 0.23 (0.02)  | 0.23 (0.04)  | 0.25 (0.03)  | 0.18 (0.03)  |
| 32  | γ-maaliene                      | 1435 <sup>a,b</sup>     | 1427 <sup>a</sup> | 0.39 (0.03)  | 0.62 (0.03)  | 0.38 (0.03)  | 0.39 (0.03)  | 0.62 (0.04)  | 0.49 (0.03)  |
| 33  | α-maaliene                      | 1443 <sup>a,b</sup>     | 1442 <sup>a</sup> | 0.31 (0.02)  | 0.49 (0.03)  | 0.35 (0.03)  | 0.47 (0.03)  | 0.47 (0.05)  | 0.49 (0.03)  |
| 34  | aromandendrene                  | 1445 <sup>a,b</sup>     | 1447 <sup>a</sup> | 6.32 (0.05)  | 7.92 (0.04)  | 6.17 (0.04)  | 7.45 (0.03)  | 7.12 (0.06)  | 6.99 (0.04)  |
| 35  | selina-5,11-diene               | 1447 <sup>a,b</sup>     | 1454 <sup>a</sup> | 0.53 (0.03)  | 0.85 (0.02)  | 0.65 (0.03)  | 0.82 (0.02)  | 0.83 (0.02)  | 0.81 (0.03)  |
| 36  | dehydroaromadendrene            | 1456 <sup>c</sup>       | 1460 <sup>c</sup> | 1.47 (0.02)  | 1.62 (0.03)  | 1.45 (0.04)  | 1.51 (0.03)  | 1.43 (0.02)  | 1.57 (0.02)  |
| 37  | 1,2,9,10-tetrahydroaristolane   | 1461                    | ND                | 1.36 (0.03)  | 0.94 (0.02)  | 1.26 (0.03)  | 1.12 (0.03)  | 1.23 (0.03)  | 1.26 (0.03)  |
| 38  | 204[M+](15) 91(100) 105(84)     | 1465                    | ND                | 0.35 (0.02)  | 0.42 (0.02)  | 0.32 (0.02)  | 0.33 (0.02)  | 0.38 (0.04)  | 0.36 (0.04)  |
| 39  | 204[M+](18) 128(100) 143(95)    | 1469                    | ND                | 0.44 (0.02)  | 0.26 (0.03)  | 0.41 (0.02)  | 0.41 (0.03)  | 0.37 (0.02)  | 0.46 (0.02)  |
| 40  | γ-gurjunene                     | 1474 <sup>c,d</sup>     | 1475 <sup>c</sup> | 0.46 (0.03)  | 0.48 (0.02)  | 0.39 (0.02)  | 0.40 (0.03)  | 0.38 (0.04)  | 0.43 (0.03)  |
| 41  | γ-murolene                      | 1477 <sup>c</sup>       | 1478 <sup>c</sup> | 0.21 (0.04)  | 0.25 (0.03)  | 0.20 (0.02)  | 0.17 (0.03)  | 0.27 (0.03)  | 0.23 (0.03)  |
| 42  | δ-selinene                      | 1488 <sup>c</sup>       | 1492 <sup>c</sup> | 2.19 (0.05)  | 2.26 (0.05)  | 2.06 (0.04)  | 2.25 (0.04)  | 2.21 (0.03)  | 2.23 (0.04)  |
| 43  | ledene                          | 1492 <sup>a,b,c</sup>   | 1496 <sup>c</sup> | 1.99 (0.03)  | 2.11 (0.03)  | 2.00 (0.04)  | 2.09 (0.02)  | 2.01 (0.02)  | 2.01 (0.03)  |
| 44  | 204[M+](38) 105(100) 93(96)     | 1495                    | ND                | 0.26 (0.02)  | 0.12 (0.02)  | 0.23 (0.03)  | 0.16 (0.02)  | 0.16 (0.01)  | 0.29 (0.03)  |
| 45  | bicyclogermacrene               | 1499 <sup>a,b,c</sup>   | 1500 <sup>c</sup> | 17.68 (0.06) | 17.12 (0.05) | 17.61 (0.06) | 16.78 (0.06) | 16.94 (0.06) | 17.12 (0.06) |
| 46  | 204[M+](19) 93(100) 91(95)      | 1505                    | ND                | 0.22 (0.03)  | 0.59 (0.04)  | 0.42 (0.02)  | 0.42 (0.02)  | 0.55 (0.02)  | 0.45 (0.03)  |
| 47  | 202[M+](25) 133(100) 91(89)     | 1509                    | ND                | 0.08 (0.01)  | 0.16 (0.02)  | 0.09 (0.01)  | 0.10 (0.01)  | 0.13 (0.03)  | 0.19 (0.02)  |
| 48  | 206[M+](14) 191(100) 57(38)     | 1514                    | ND                | 0.12 (0.02)  | 0.33 (0.03)  | 0.12 (0.02)  | 0.25 (0.02)  | 0.35 (0.03)  | 0.17 (0.02)  |
| 49  | 202[M+](33) 131(100) 145(53)    | 1518                    | ND                | 0.45 (0.03)  | 0.41 (0.04)  | 0.38 (0.03)  | 0.37 (0.02)  | 0.41 (0.03)  | 0.45 (0.02)  |
| 50  | δ-cadinene                      | 1524 <sup>a,b,c</sup>   | 1522 <sup>c</sup> | 0.10 (0.01)  | 0.16 (0.02)  | 0.12 (0.04)  | 0.15 (0.02)  | 0.12 (0.02)  | 0.09 (0.01)  |
| 51  | 204[M+](5) 91(100) 131(95)      | 1530                    | ND                | 0.22 (0.02)  | 0.09 (0.02)  | 0.15 (0.04)  | 0.20 (0.02)  | 0.22 (0.03)  | 0.13 (0.02)  |
| 52  | 200[M+](54) 185(100) 143(91)    | 1535                    | ND                | -            | -            | -            | -            | -            | -            |
| 53  | 4,5,9,10-dehydro-isolongifolene | 1544 <sup>a,b</sup>     | 1544 <sup>a</sup> | 4.65 (0.04)  | 4.08 (0.03)  | 4.45 (0.03)  | 4.44 (0.03)  | 4.32 (0.03)  | 4.35 (0.03)  |
| 54  | 202[M+](4) 128(100) 157(95)     | 1547                    | ND                | 0.86 (0.03)  | 0.71 (0.02)  | 0.81 (0.02)  | 0.71 (0.03)  | 0.73 (0.02)  | 0.81 (0.01)  |

|                              |                                               |                         |                   |              |              |              |              |              |              |
|------------------------------|-----------------------------------------------|-------------------------|-------------------|--------------|--------------|--------------|--------------|--------------|--------------|
| 55                           | 200[M+](8) 171(100) 186(79)                   | 1551                    | ND                | 0.09 (0.01)  | 0.09 (0.02)  | 0.06 (0.02)  | 0.11 (0.01)  | 0.11 (0.02)  | 0.07 (0.01)  |
| 56                           | 200[M+](91) 129(100) 157(88)                  | 1556                    | ND                | 0.07 (0.02)  | 0.06 (0.01)  | 0.08 (0.01)  | 0.08 (0.01)  | 0.08 (0.01)  | 0.03 (0.01)  |
| 57                           | 204[M+](8) 143(100) 157(98)                   | 1559                    | ND                | 0.06 (0.02)  | 0.04 (0.01)  | 0.03 (0.01)  | 0.03 (0.01)  | 0.06 (0.01)  | 0.07 (0.01)  |
| 58                           | 204[M+](82) 173(100) 189(94)                  | 1563                    | ND                | 1.25 (0.05)  | 1.25 (0.03)  | 1.23 (0.04)  | 1.25 (0.03)  | 1.26 (0.03)  | 1.21 (0.03)  |
| 59                           | palustrol                                     | 1567 <sup>c</sup>       | 1567 <sup>c</sup> | 5.16 (0.04)  | 5.54 (0.03)  | 5.52 (0.03)  | 5.36 (0.04)  | 5.29 (0.03)  | 5.34 (0.06)  |
| 60                           | 200[M+](11) 79(100) 93(95)                    | 1570                    | ND                | 0.67 (0.03)  | 0.46 (0.02)  | 0.54 (0.02)  | 0.47 (0.02)  | 0.61 (0.04)  | 0.54 (0.03)  |
| 61                           | 204[M+](31) 81(100) 109(88)                   | 1573                    | ND                | 2.45 (0.02)  | 1.89 (0.03)  | 2.19 (0.03)  | 2.23 (0.02)  | 1.92 (0.04)  | 1.87 (0.03)  |
| 62                           | spathulenol                                   | 1576 <sup>a,b,c</sup>   | 1577 <sup>c</sup> | 2.62 (0.04)  | 2.64 (0.05)  | 2.69 (0.03)  | 2.69 (0.03)  | 2.64 (0.05)  | 2.63 (0.04)  |
| 63                           | 200[M+](56) 185(100) 143(63)                  | 1581                    | ND                | 2.43 (0.03)  | 2.57 (0.06)  | 2.46 (0.03)  | 2.42 (0.02)  | 2.41 (0.03)  | 2.58 (0.03)  |
| 64                           | 202[M+](4) 91(100) 79(82)                     | 1587                    | ND                | 0.32 (0.01)  | 0.35 (0.02)  | 0.36 (0.02)  | 0.29 (0.02)  | 0.32 (0.03)  | 0.29 (0.02)  |
| 65                           | globulol                                      | 1599 <sup>a,b,c,d</sup> | 1590 <sup>c</sup> | 1.48 (0.04)  | 1.09 (0.03)  | 1.46 (0.02)  | 1.36 (0.04)  | 1.29 (0.03)  | 1.33 (0.02)  |
| 66                           | 200[M+](8) 198(100) 183(84)                   | 1605                    | ND                | -            | -            | -            | -            | -            | -            |
| 67                           | 220[M+](2) 145(100) 200(93)                   | 1609                    | ND                | 0.08 (0.01)  | 0.08 (0.01)  | 0.09 (0.01)  | 0.09 (0.02)  | 0.11 (0.02)  | 0.08 (0.01)  |
| 68                           | (+)-bisabola-2,10-diene[1,9]oxide             | 1615 <sup>a,b</sup>     | 1596 <sup>a</sup> | 0.32 (0.03)  | 0.33 (0.04)  | 0.35 (0.02)  | 0.26 (0.02)  | 0.29 (0.03)  | 0.29 (0.03)  |
| 69                           | 208[M+](3) 95(100) 85(95)                     | 1621                    | ND                | 0.69 (0.03)  | 0.12 (0.03)  | 0.62 (0.03)  | 0.59 (0.03)  | 0.51 (0.02)  | 0.53 (0.03)  |
| 70                           | ledene oxide-(II)                             | 1631 <sup>a,b</sup>     | 1631 <sup>a</sup> | -            | -            | -            | -            | -            | -            |
| 71                           | isospathulenol                                | 1635 <sup>a,b</sup>     | 1633 <sup>a</sup> | 0.27 (0.05)  | 0.30 (0.04)  | 0.33 (0.04)  | 0.35 (0.04)  | 0.39 (0.02)  | 0.37 (0.02)  |
| 72                           | 220[M+](18) 91(100) 105(83)                   | 1639                    | ND                | 0.82 (0.03)  | 0.78 (0.05)  | 0.71 (0.03)  | 0.76 (0.05)  | 0.69 (0.03)  | 0.75 (0.03)  |
| 73                           | cubenol                                       | 1642 <sup>a,b,c,d</sup> | 1645 <sup>c</sup> | 0.12 (0.01)  | 0.05 (0.01)  | 0.07 (0.02)  | 0.09 (0.01)  | 0.06 (0.01)  | 0.04 (0.01)  |
| 74                           | 220[M+](21) 91(100) 105(82)                   | 1651                    | ND                | 0.09 (0.02)  | 0.04 (0.01)  | 0.06 (0.01)  | 0.03 (0.01)  | 0.02 (0.01)  | 0.03 (0.01)  |
| 75                           | 222[M+](3) 179(100) 121(92)                   | 1655                    | ND                | 0.06 (0.01)  | 0.06 (0.01)  | 0.04 (0.01)  | 0.04 (0.01)  | 0.05 (0.01)  | 0.04 (0.02)  |
| 76                           | germacra-4(15),5,10(14)-trien-1- $\alpha$ -ol | 1660 <sup>c</sup>       | 1685 <sup>c</sup> | 0.89 (0.05)  | 0.93 (0.04)  | 0.91 (0.04)  | 0.91 (0.04)  | 0.87 (0.04)  | 0.95 (0.03)  |
| 77                           | 216[M+](31) 145(100) 91(97)                   | 1699                    | ND                | 0.17 (0.02)  | 0.25 (0.03)  | 0.16 (0.03)  | 0.21 (0.02)  | 0.21 (0.03)  | 0.20 (0.04)  |
| 78                           | 1,4-dimethyl-7-(1-methylethyl)-azulene        | 1790 <sup>c</sup>       | 1779 <sup>c</sup> | 1.12 (0.06)  | 1.27 (0.05)  | 1.25 (0.03)  | 1.23 (0.03)  | 1.30 (0.04)  | 1.24 (0.05)  |
| 79                           | 14-hydroxy- $\delta$ -cadinene                | 1797 <sup>c</sup>       | 1803 <sup>c</sup> | 0.23 (0.02)  | 0.02 (0.01)  | 0.18 (0.02)  | 0.15 (0.02)  | 0.12 (0.02)  | 0.17 (0.01)  |
| Total                        |                                               |                         |                   | 98.97 (2.05) | 98.67 (2.00) | 97.30 (1.89) | 98.22 (1.91) | 98.91 (1.97) | 98.75 (1.94) |
| % Identified                 |                                               |                         |                   | 83.83 (1.28) | 84.99 (1.19) | 83.31 (1.17) | 84.21 (1.17) | 84.32 (1.20) | 84.36 (1.16) |
| Including:                   |                                               |                         |                   |              |              |              |              |              |              |
| Aliphatics                   |                                               |                         |                   | 1.42 (0.17)  | 1.30 (0.14)  | 1.21 (0.13)  | 1.24 (0.13)  | 1.22 (0.15)  | 1.22 (0.13)  |
| Aromatics                    |                                               |                         |                   | 2.57 (0.14)  | 2.50 (0.16)  | 2.29 (0.15)  | 2.42 (0.14)  | 2.41 (0.12)  | 2.13 (0.14)  |
| Monoterpene hydrocarbons     |                                               |                         |                   | 0.03 (0.01)  | 0.03 (0.01)  | 0.02 (0.01)  | 0.03 (0.01)  | 0.03 (0.01)  | 0.02 (0.01)  |
| Monoterpenoid hydrocarbons   |                                               |                         |                   | 0.05 (0.01)  | 0.04 (0.01)  | 0.04 (0.01)  | 0.03 (0.01)  | 0.06 (0.01)  | 0.02 (0.01)  |
| Sesquiterpene hydrocarbons   |                                               |                         |                   | 68.67 (0.67) | 70.22 (0.62) | 68.24 (0.65) | 69.32 (0.64) | 69.65 (0.68) | 69.85 (0.65) |
| Sesquiterpenoid hydrocarbons |                                               |                         |                   | 11.09 (0.28) | 10.90 (0.25) | 11.51 (0.22) | 11.17 (0.24) | 10.95 (0.23) | 11.12 (0.22) |

- less than 0.01%. \* The names of terpenes and terpenoids according to IUPAC terminology are given in Table S5. \*\* Retention index on Quadex 007-5MS column. \*\*\* Literature retention index. ND No data. \*\*\*\* For abbreviations of samples see Table 1. ( ) standard deviation. Identification of compounds by MS databases (<sup>a</sup> - NIST 2011, <sup>b</sup> - NIST Chemistry WebBook, <sup>c</sup> - Adams 4 Library, <sup>d</sup> - Pherobase).

Table S3b. Volatile compounds detected in the samples collected in summer (CI-57 – CI-62).

| No. | Compounds*                      | RI**                    | RI***             | Code****     |              |              |              |              |              |
|-----|---------------------------------|-------------------------|-------------------|--------------|--------------|--------------|--------------|--------------|--------------|
|     |                                 |                         |                   | CI-57        | CI-58        | CI-59        | CI-60        | CI-61        | CI-62        |
| 1   | propan-1-ol                     | <700 <sup>a,b</sup>     | 483 <sup>a</sup>  | 0.45 (0.03)  | 0.42 (0.03)  | 0.38 (0.02)  | 0.39 (0.03)  | 0.40 (0.02)  | 0.41 (0.02)  |
| 2   | pentanal                        | 705 <sup>a,b,c,d</sup>  | 704 <sup>c</sup>  | 0.28 (0.02)  | 0.30 (0.02)  | 0.33 (0.04)  | 0.34 (0.02)  | 0.29 (0.03)  | 0.32 (0.04)  |
| 3   | hexanal                         | 802 <sup>a,b,c,d</sup>  | 801 <sup>c</sup>  | 0.05 (0.01)  | 0.08 (0.01)  | 0.09 (0.01)  | 0.10 (0.01)  | 0.11 (0.01)  | 0.08 (0.02)  |
| 4   | hexan-1-ol                      | 867 <sup>a,b</sup>      | 869 <sup>a</sup>  | 0.29 (0.03)  | 0.31 (0.03)  | 0.34 (0.02)  | 0.35 (0.02)  | 0.31 (0.02)  | 0.36 (0.03)  |
| 5   | heptanal                        | 902 <sup>a,b,c,d</sup>  | 901 <sup>c</sup>  | 0.05 (0.01)  | 0.06 (0.01)  | 0.03 (0.01)  | 0.05 (0.01)  | 0.06 (0.01)  | 0.05 (0.01)  |
| 6   | α-pinene                        | 939 <sup>a,b,c</sup>    | 932 <sup>c</sup>  | 0.01 (0.01)  | 0.01 (0.01)  | 0.01 (0.01)  | 0.03 (0.01)  | 0.04 (0.01)  | 0.06 (0.01)  |
| 7   | benzaldehyde                    | 940 <sup>a,b,c</sup>    | 952 <sup>c</sup>  | 0.07 (0.01)  | 0.11 (0.02)  | 0.09 (0.01)  | 0.09 (0.02)  | 0.09 (0.01)  | 0.09 (0.02)  |
| 8   | 2-ethylhexan-1-ol               | 1023 <sup>a,b</sup>     | 1025 <sup>a</sup> | 0.03 (0.01)  | 0.03 (0.01)  | 0.04 (0.01)  | 0.04 (0.01)  | 0.05 (0.01)  | 0.06 (0.01)  |
| 9   | phenylmethanol                  | 1028 <sup>a,b,c</sup>   | 1026 <sup>c</sup> | 1.03 (0.02)  | 1.01 (0.05)  | 1.08 (0.04)  | 1.08 (0.03)  | 1.02 (0.03)  | 1.04 (0.03)  |
| 10  | phenylacetaldehyde              | 1044 <sup>a,b</sup>     | 1044 <sup>a</sup> | 0.25 (0.03)  | 0.18 (0.02)  | 0.21 (0.02)  | 0.21 (0.01)  | 0.22 (0.02)  | 0.25 (0.03)  |
| 11  | nonanal                         | 1102 <sup>a,b,c,d</sup> | 1100 <sup>c</sup> | 0.03 (0.01)  | 0.01 (0.01)  | 0.01 (0.01)  | 0.02 (0.01)  | 0.03 (0.01)  | 0.02 (0.01)  |
| 12  | 3,4-dimethylcyclohexan-1-ol     | 1115 <sup>a,b</sup>     | 1126 <sup>a</sup> | 0.04 (0.01)  | 0.06 (0.01)  | 0.05 (0.01)  | 0.06 (0.02)  | 0.04 (0.01)  | 0.03 (0.01)  |
| 13  | phenylethanol                   | 1121 <sup>a,b</sup>     | 1121 <sup>a</sup> | 0.71 (0.02)  | 0.74 (0.02)  | 0.73 (0.02)  | 0.73 (0.02)  | 0.73 (0.01)  | 0.71 (0.04)  |
| 14  | decanal                         | 1195 <sup>a,b,c,d</sup> | 1201 <sup>c</sup> | 0.03 (0.01)  | 0.03 (0.01)  | 0.03 (0.01)  | 0.02 (0.01)  | 0.02 (0.01)  | 0.03 (0.01)  |
| 15  | β-cyclocitral                   | 1221 <sup>c</sup>       | 1217 <sup>c</sup> | 0.04 (0.01)  | 0.04 (0.01)  | 0.06 (0.01)  | 0.03 (0.01)  | 0.03 (0.01)  | 0.05 (0.01)  |
| 16  | 2-phenoxyethan-1-ol             | 1225 <sup>a,b</sup>     | 1226 <sup>a</sup> | 0.37 (0.03)  | 0.40 (0.03)  | 0.41 (0.03)  | 0.40 (0.01)  | 0.41 (0.02)  | 0.39 (0.02)  |
| 17  | bicycloelemene                  | 1316 <sup>a</sup>       | 1330 <sup>a</sup> | 0.10 (0.01)  | 0.07 (0.01)  | 0.07 (0.01)  | 0.09 (0.01)  | 0.08 (0.01)  | 0.09 (0.01)  |
| 18  | δ-elemene                       | 1324 <sup>a,b,c</sup>   | 1335 <sup>c</sup> | 2.19 (0.04)  | 2.18 (0.03)  | 2.21 (0.04)  | 1.97 (0.04)  | 1.82 (0.04)  | 1.85 (0.05)  |
| 19  | 204[M+](5) 121(100) 93(89)      | 1343                    | ND                | 0.43 (0.03)  | 0.46 (0.03)  | 0.39 (0.01)  | 0.42 (0.03)  | 0.39 (0.02)  | 0.45 (0.03)  |
| 20  | 200[M+](39) 159(100) 117(95)    | 1345                    | ND                | 0.83 (0.02)  | 0.81 (0.01)  | 0.82 (0.02)  | 0.73 (0.01)  | 0.74 (0.03)  | 0.76 (0.03)  |
| 21  | 202[M+](13) 81(100) 96(73)      | 1350                    | ND                | 0.17 (0.02)  | 0.21 (0.02)  | 0.22 (0.01)  | 0.18 (0.01)  | 0.19 (0.02)  | 0.20 (0.04)  |
| 22  | 204[M+](10) 119(100) 91(84)     | 1353                    | ND                | 0.08 (0.02)  | 0.10 (0.02)  | 0.09 (0.01)  | 0.08 (0.01)  | 0.06 (0.01)  | 0.06 (0.04)  |
| 23  | anastreptene                    | 1370 <sup>a</sup>       | 1370 <sup>a</sup> | 25.29 (0.05) | 25.26 (0.05) | 25.26 (0.05) | 25.28 (0.04) | 25.09 (0.05) | 25.13 (0.02) |
| 24  | 204[M+](5) 81(100) 93(96)       | 1384                    | ND                | 0.18 (0.02)  | 0.18 (0.01)  | 0.16 (0.02)  | 0.18 (0.01)  | 0.19 (0.03)  | 0.23 (0.03)  |
| 25  | β-elemene                       | 1391 <sup>a,b,c</sup>   | 1389 <sup>c</sup> | 2.38 (0.04)  | 2.01 (0.03)  | 2.18 (0.04)  | 2.10 (0.04)  | 2.02 (0.03)  | 2.01 (0.02)  |
| 26  | 204[M+](13) 157(100) 185(84)    | 1398                    | ND                | 0.19 (0.02)  | 0.21 (0.03)  | 0.23 (0.02)  | 0.23 (0.02)  | 0.24 (0.02)  | 0.23 (0.03)  |
| 27  | 204[M+](13) 157(100) 185(84)    | 1417                    | ND                | 0.24 (0.02)  | 0.26 (0.02)  | 0.24 (0.03)  | 0.27 (0.01)  | 0.27 (0.02)  | 0.27 (0.02)  |
| 28  | 204[M+](19) 135(100) 105(82)    | 1423                    | ND                | 0.31 (0.03)  | 0.27 (0.01)  | 0.27 (0.04)  | 0.31 (0.02)  | 0.32 (0.03)  | 0.25 (0.01)  |
| 29  | 204[M+](9) 91(100) 105(93)      | 1425                    | ND                | 0.09 (0.01)  | 0.10 (0.01)  | 0.11 (0.01)  | 0.09 (0.01)  | 0.08 (0.01)  | 0.11 (0.01)  |
| 30  | (-)-aristolene                  | 1429 <sup>a,b,c,d</sup> | 1428 <sup>a</sup> | 0.76 (0.03)  | 0.76 (0.03)  | 0.81 (0.04)  | 0.79 (0.03)  | 0.81 (0.02)  | 0.72 (0.01)  |
| 31  | 204[M+](9) 107(100) 79(43)      | 1432                    | ND                | 0.27 (0.03)  | 0.30 (0.02)  | 0.31 (0.03)  | 0.29 (0.02)  | 0.32 (0.02)  | 0.29 (0.04)  |
| 32  | γ-maaliene                      | 1435 <sup>a,b</sup>     | 1427 <sup>a</sup> | 0.57 (0.04)  | 0.57 (0.03)  | 0.56 (0.03)  | 0.59 (0.03)  | 0.56 (0.02)  | 0.62 (0.06)  |
| 33  | α-maaliene                      | 1443 <sup>a,b</sup>     | 1442 <sup>a</sup> | 0.42 (0.02)  | 0.33 (0.02)  | 0.43 (0.05)  | 0.42 (0.02)  | 0.43 (0.03)  | 0.43 (0.03)  |
| 34  | aromandendrene                  | 1445 <sup>a,b</sup>     | 1447 <sup>a</sup> | 7.54 (0.04)  | 7.21 (0.05)  | 6.98 (0.03)  | 7.55 (0.05)  | 6.98 (0.05)  | 6.99 (0.03)  |
| 35  | selina-5,11-diene               | 1447 <sup>a,b</sup>     | 1454 <sup>a</sup> | 0.67 (0.03)  | 0.75 (0.02)  | 0.75 (0.03)  | 0.76 (0.03)  | 0.74 (0.01)  | 0.79 (0.04)  |
| 36  | dehydroaromadendrene            | 1456 <sup>c</sup>       | 1460 <sup>c</sup> | 1.39 (0.02)  | 1.40 (0.05)  | 1.53 (0.04)  | 1.59 (0.03)  | 1.62 (0.03)  | 1.48 (0.03)  |
| 37  | 1,2,9,10-tetrahydroaristolane   | 1461                    | ND                | 1.04 (0.02)  | 1.04 (0.02)  | 0.97 (0.04)  | 1.19 (0.02)  | 1.33 (0.03)  | 1.35 (0.02)  |
| 38  | 204[M+](15) 91(100) 105(84)     | 1465                    | ND                | 0.30 (0.03)  | 0.30 (0.03)  | 0.34 (0.05)  | 0.43 (0.02)  | 0.42 (0.02)  | 0.46 (0.03)  |
| 39  | 204[M+](18) 128(100) 143(95)    | 1469                    | ND                | 0.32 (0.02)  | 0.42 (0.02)  | 0.43 (0.06)  | 0.42 (0.01)  | 0.38 (0.03)  | 0.41 (0.02)  |
| 40  | γ-gurjunene                     | 1474 <sup>c,d</sup>     | 1475 <sup>c</sup> | 0.51 (0.02)  | 0.51 (0.03)  | 0.39 (0.03)  | 0.48 (0.02)  | 0.47 (0.03)  | 0.57 (0.06)  |
| 41  | γ-murolene                      | 1477 <sup>c</sup>       | 1478 <sup>c</sup> | 0.19 (0.01)  | 0.26 (0.02)  | 0.24 (0.05)  | 0.25 (0.01)  | 0.26 (0.02)  | 0.29 (0.02)  |
| 42  | δ-selinene                      | 1488 <sup>c</sup>       | 1492 <sup>c</sup> | 2.10 (0.05)  | 2.16 (0.03)  | 2.18 (0.02)  | 2.19 (0.02)  | 2.21 (0.05)  | 2.09 (0.04)  |
| 43  | ledene                          | 1492 <sup>a,b,c</sup>   | 1496 <sup>c</sup> | 1.92 (0.03)  | 1.87 (0.03)  | 1.93 (0.04)  | 1.87 (0.02)  | 1.92 (0.02)  | 1.83 (0.05)  |
| 44  | 204[M+](38) 105(100) 93(96)     | 1495                    | ND                | 0.18 (0.01)  | 0.23 (0.04)  | 0.24 (0.03)  | 0.24 (0.02)  | 0.25 (0.03)  | 0.31 (0.03)  |
| 45  | bicyclogermacrene               | 1499 <sup>a,b,c</sup>   | 1500 <sup>c</sup> | 17.82 (0.05) | 17.98 (0.05) | 17.32 (0.06) | 16.45 (0.03) | 17.02 (0.06) | 16.96 (0.03) |
| 46  | 204[M+](19) 93(100) 91(95)      | 1505                    | ND                | 0.37 (0.02)  | 0.57 (0.02)  | 0.57 (0.03)  | 0.53 (0.03)  | 0.51 (0.04)  | 0.47 (0.02)  |
| 47  | 202[M+](25) 133(100) 91(89)     | 1509                    | ND                | 0.14 (0.01)  | 0.11 (0.01)  | 0.12 (0.02)  | 0.14 (0.02)  | 0.13 (0.03)  | 0.18 (0.01)  |
| 48  | 206[M+](14) 191(100) 57(38)     | 1514                    | ND                | 0.09 (0.01)  | 0.13 (0.01)  | 0.08 (0.04)  | 0.22 (0.03)  | 0.27 (0.04)  | 0.31 (0.05)  |
| 49  | 202[M+](33) 131(100) 145(53)    | 1518                    | ND                | 0.44 (0.03)  | 0.37 (0.02)  | 0.39 (0.04)  | 0.37 (0.03)  | 0.36 (0.03)  | 0.43 (0.04)  |
| 50  | δ-cadinene                      | 1524 <sup>a,b,c</sup>   | 1522 <sup>c</sup> | 0.14 (0.01)  | 0.12 (0.01)  | 0.16 (0.01)  | 0.14 (0.02)  | 0.11 (0.02)  | 0.15 (0.02)  |
| 51  | 204[M+](5) 91(100) 131(95)      | 1530                    | ND                | 0.19 (0.01)  | 0.16 (0.02)  | 0.15 (0.03)  | 0.16 (0.04)  | 0.16 (0.02)  | 0.18 (0.04)  |
| 52  | 200[M+](54) 185(100) 143(91)    | 1535                    | ND                | -            | -            | -            | -            | -            | -            |
| 53  | 4,5,9,10-dehydro-isolongifolene | 1544 <sup>a,b</sup>     | 1544 <sup>a</sup> | 4.35 (0.04)  | 4.32 (0.04)  | 4.32 (0.03)  | 4.34 (0.05)  | 4.43 (0.04)  | 4.41 (0.06)  |
| 54  | 202[M+](4) 128(100) 157(95)     | 1547                    | ND                | 0.76 (0.02)  | 0.71 (0.02)  | 0.69 (0.04)  | 0.73 (0.03)  | 0.78 (0.03)  | 0.71 (0.03)  |

|                              |                                               |                         |                   |              |              |              |              |              |              |
|------------------------------|-----------------------------------------------|-------------------------|-------------------|--------------|--------------|--------------|--------------|--------------|--------------|
| 55                           | 200[M+](8) 171(100) 186(79)                   | 1551                    | ND                | 0.11 (0.02)  | 0.08 (0.01)  | 0.11 (0.01)  | 0.09 (0.01)  | 0.09 (0.02)  | 0.13 (0.04)  |
| 56                           | 200[M+](91) 129(100) 157(88)                  | 1556                    | ND                | 0.06 (0.03)  | 0.04 (0.01)  | 0.09 (0.01)  | 0.04 (0.01)  | 0.06 (0.01)  | 0.08 (0.01)  |
| 57                           | 204[M+](8) 143(100) 157(98)                   | 1559                    | ND                | 0.07 (0.01)  | 0.02 (0.01)  | 0.06 (0.01)  | 0.06 (0.02)  | 0.05 (0.01)  | 0.07 (0.01)  |
| 58                           | 204[M+](82) 173(100) 189(94)                  | 1563                    | ND                | 1.23 (0.02)  | 1.19 (0.03)  | 1.19 (0.04)  | 1.24 (0.03)  | 1.25 (0.04)  | 1.26 (0.03)  |
| 59                           | palustrol                                     | 1567 <sup>c</sup>       | 1567 <sup>c</sup> | 5.09 (0.04)  | 5.10 (0.04)  | 5.02 (0.04)  | 5.19 (0.02)  | 5.04 (0.04)  | 5.43 (0.04)  |
| 60                           | 200[M+](11) 79(100) 93(95)                    | 1570                    | ND                | 0.43 (0.02)  | 0.63 (0.03)  | 0.57 (0.01)  | 0.50 (0.02)  | 0.61 (0.03)  | 0.46 (0.02)  |
| 61                           | 204[M+](31) 81(100) 109(88)                   | 1573                    | ND                | 1.95 (0.03)  | 2.14 (0.03)  | 2.08 (0.01)  | 2.23 (0.03)  | 2.14 (0.03)  | 2.13 (0.03)  |
| 62                           | spathulenol                                   | 1576 <sup>a,b,c</sup>   | 1577 <sup>c</sup> | 2.62 (0.06)  | 2.67 (0.04)  | 2.64 (0.05)  | 2.47 (0.04)  | 2.67 (0.03)  | 2.73 (0.03)  |
| 63                           | 200[M+](56) 185(100) 143(63)                  | 1581                    | ND                | 2.45 (0.05)  | 2.44 (0.03)  | 2.42 (0.04)  | 2.44 (0.02)  | 2.48 (0.02)  | 2.40 (0.04)  |
| 64                           | 202[M+](4) 91(100) 79(82)                     | 1587                    | ND                | 0.31 (0.02)  | 0.27 (0.03)  | 0.30 (0.01)  | 0.29 (0.02)  | 0.30 (0.02)  | 0.28 (0.03)  |
| 65                           | globulol                                      | 1599 <sup>a,b,c,d</sup> | 1590 <sup>c</sup> | 1.39 (0.03)  | 1.38 (0.02)  | 1.53 (0.03)  | 1.48 (0.03)  | 1.49 (0.03)  | 1.39 (0.04)  |
| 66                           | 200[M+](8) 198(100) 183(84)                   | 1605                    | ND                | -            | -            | -            | -            | -            | -            |
| 67                           | 220[M+](2) 145(100) 200(93)                   | 1609                    | ND                | 0.10 (0.01)  | 0.08 (0.02)  | 0.09 (0.01)  | 0.07 (0.01)  | 0.08 (0.01)  | 0.07 (0.03)  |
| 68                           | (+)-bisabola-2,10-diene[1,9]oxide             | 1615 <sup>a,b</sup>     | 1596 <sup>a</sup> | 0.32 (0.02)  | 0.27 (0.03)  | 0.28 (0.03)  | 0.28 (0.02)  | 0.28 (0.05)  | 0.27 (0.02)  |
| 69                           | 208[M+](3) 95(100) 85(95)                     | 1621                    | ND                | 0.46 (0.02)  | 0.61 (0.04)  | 0.69 (0.03)  | 0.54 (0.03)  | 0.53 (0.04)  | 0.52 (0.02)  |
| 70                           | ledene oxide-(II)                             | 1631 <sup>a,b</sup>     | 1631 <sup>a</sup> | -            | -            | -            | -            | -            | -            |
| 71                           | isospathulenol                                | 1635 <sup>a,b</sup>     | 1633 <sup>a</sup> | 0.29 (0.02)  | 0.37 (0.04)  | 0.39 (0.02)  | 0.33 (0.02)  | 0.39 (0.01)  | 0.34 (0.01)  |
| 72                           | 220[M+](18) 91(100) 105(83)                   | 1639                    | ND                | 0.73 (0.02)  | 0.77 (0.06)  | 0.69 (0.03)  | 0.73 (0.03)  | 0.77 (0.03)  | 0.62 (0.03)  |
| 73                           | cubenol                                       | 1642 <sup>a,b,c,d</sup> | 1645 <sup>c</sup> | 0.09 (0.01)  | 0.09 (0.01)  | 0.06 (0.01)  | 0.08 (0.01)  | 0.09 (0.02)  | 0.13 (0.03)  |
| 74                           | 220[M+](21) 91(100) 105(82)                   | 1651                    | ND                | 0.04 (0.02)  | 0.03 (0.01)  | 0.04 (0.01)  | 0.03 (0.01)  | 0.04 (0.01)  | 0.05 (0.01)  |
| 75                           | 222[M+](3) 179(100) 121(92)                   | 1655                    | ND                | 0.07 (0.02)  | 0.04 (0.01)  | 0.04 (0.01)  | 0.03 (0.01)  | 0.06 (0.01)  | 0.02 (0.01)  |
| 76                           | germacra-4(15),5,10(14)-trien-1- $\alpha$ -ol | 1660 <sup>c</sup>       | 1685 <sup>c</sup> | 0.95 (0.02)  | 0.78 (0.02)  | 0.89 (0.04)  | 0.87 (0.03)  | 0.95 (0.01)  | 0.92 (0.04)  |
| 77                           | 216[M+](31) 145(100) 91(97)                   | 1699                    | ND                | 0.15 (0.03)  | 0.23 (0.04)  | 0.21 (0.02)  | 0.25 (0.02)  | 0.22 (0.03)  | 0.25 (0.04)  |
| 78                           | 1,4-dimethyl-7-(1-methylethyl)-azulene        | 1790 <sup>c</sup>       | 1779 <sup>c</sup> | 1.24 (0.03)  | 1.11 (0.02)  | 1.23 (0.03)  | 1.18 (0.03)  | 1.33 (0.06)  | 1.14 (0.04)  |
| 79                           | 14-hydroxy- $\delta$ -cadinene                | 1797 <sup>c</sup>       | 1803 <sup>c</sup> | 0.08 (0.01)  | 0.09 (0.02)  | 0.05 (0.01)  | 0.18 (0.02)  | 0.11 (0.02)  | 0.16 (0.04)  |
| Total                        |                                               |                         |                   | 98.92 (1.76) | 98.92 (1.82) | 98.70 (1.97) | 98.61 (1.63) | 98.84 (1.86) | 98.87 (2.11) |
| % Identified                 |                                               |                         |                   | 85.18 (1.05) | 84.45 (1.09) | 84.27 (1.18) | 84.05 (0.98) | 84.10 (1.07) | 84.22 (1.21) |
| Including:                   |                                               |                         |                   |              |              |              |              |              |              |
| Aliphatics                   |                                               |                         |                   | 1.25 (0.14)  | 1.30 (0.14)  | 1.30 (0.14)  | 1.37 (0.14)  | 1.31 (0.13)  | 1.36 (0.16)  |
| Aromatics                    |                                               |                         |                   | 2.43 (0.11)  | 2.44 (0.14)  | 2.52 (0.12)  | 2.51 (0.09)  | 2.47 (0.09)  | 2.48 (0.14)  |
| Monoterpene hydrocarbons     |                                               |                         |                   | 0.01 (0.01)  | 0.01 (0.01)  | 0.01 (0.01)  | 0.03 (0.01)  | 0.04 (0.01)  | 0.06 (0.01)  |
| Monoterpenoid hydrocarbons   |                                               |                         |                   | 0.04 (0.01)  | 0.04 (0.01)  | 0.06 (0.01)  | 0.03 (0.01)  | 0.03 (0.01)  | 0.05 (0.01)  |
| Sesquiterpene hydrocarbons   |                                               |                         |                   | 70.62 (0.58) | 69.91 (0.57) | 69.52 (0.67) | 69.23 (0.54) | 69.23 (0.62) | 68.90 (0.64) |
| Sesquiterpenoid hydrocarbons |                                               |                         |                   | 10.83 (0.21) | 10.75 (0.22) | 10.86 (0.23) | 10.88 (0.19) | 11.02 (0.21) | 11.37 (0.25) |

- less than 0.01%. \* The names of terpenes and terpenoids according to IUPAC terminology are given in Table S5. \*\* Retention index on Quadex 007-5MS column. \*\*\* Literature retention index. ND No data. \*\*\*\* For abbreviations of samples see Table 1. ( ) standard deviation. Identification of compounds by MS databases (<sup>a</sup> - NIST 2011, <sup>b</sup> - NIST Chemistry WebBook, <sup>c</sup> - Adams 4 Library, <sup>d</sup> - Pherobase).

**Table S4a.** Volatile compounds detected in the samples collected in autumn (CI-63 – CI-68).

| No. | Compounds*                      | RI**                    | RI***             | Code****     |              |              |              |              |              |
|-----|---------------------------------|-------------------------|-------------------|--------------|--------------|--------------|--------------|--------------|--------------|
|     |                                 |                         |                   | CI-63        | CI-64        | CI-65        | CI-66        | CI-67        | CI-68        |
| 1   | propan-1-ol                     | <700 <sup>a,b</sup>     | 483 <sup>a</sup>  | 1.32 (0.03)  | 1.25 (0.03)  | 1.41 (0.03)  | 1.37 (0.03)  | 1.21 (0.04)  | 1.41 (0.05)  |
| 2   | pentanal                        | 705 <sup>a,b,c,d</sup>  | 704 <sup>c</sup>  | 0.44 (0.02)  | 0.45 (0.02)  | 0.38 (0.02)  | 0.42 (0.02)  | 0.42 (0.02)  | 0.38 (0.02)  |
| 3   | hexanal                         | 802 <sup>a,b,c,d</sup>  | 801 <sup>c</sup>  | 0.38 (0.02)  | 0.34 (0.01)  | 0.42 (0.03)  | 0.40 (0.02)  | 0.43 (0.03)  | 0.40 (0.03)  |
| 4   | hexan-1-ol                      | 867 <sup>a,b</sup>      | 869 <sup>a</sup>  | 0.28 (0.03)  | 0.28 (0.03)  | 0.25 (0.02)  | 0.32 (0.03)  | 0.29 (0.02)  | 0.31 (0.02)  |
| 5   | heptanal                        | 902 <sup>a,b,c,d</sup>  | 901 <sup>c</sup>  | 0.04 (0.01)  | 0.06 (0.01)  | 0.03 (0.01)  | 0.01 (0.01)  | 0.03 (0.01)  | 0.04 (0.01)  |
| 6   | α-pinene                        | 939 <sup>a,b,c</sup>    | 932 <sup>c</sup>  | 0.05 (0.01)  | 0.05 (0.01)  | 0.05 (0.01)  | 0.03 (0.01)  | 0.04 (0.01)  | 0.04 (0.01)  |
| 7   | benzaldehyde                    | 940 <sup>a,b,c</sup>    | 952 <sup>c</sup>  | 0.49 (0.02)  | 0.47 (0.02)  | 0.42 (0.02)  | 0.45 (0.02)  | 0.43 (0.02)  | 0.43 (0.03)  |
| 8   | 2-ethylhexan-1-ol               | 1023 <sup>a,b</sup>     | 1025 <sup>a</sup> | 0.22 (0.02)  | 0.22 (0.01)  | 0.19 (0.02)  | 0.19 (0.01)  | 0.24 (0.03)  | 0.23 (0.02)  |
| 9   | phenylmethanol                  | 1028 <sup>a,b,c</sup>   | 1026 <sup>c</sup> | 0.99 (0.03)  | 1.06 (0.03)  | 1.03 (0.02)  | 0.99 (0.03)  | 1.02 (0.03)  | 1.04 (0.04)  |
| 10  | phenylacetaldehyde              | 1044 <sup>a,b</sup>     | 1044 <sup>a</sup> | 1.72 (0.03)  | 1.75 (0.03)  | 1.69 (0.03)  | 1.72 (0.03)  | 1.72 (0.03)  | 1.74 (0.03)  |
| 11  | nonanal                         | 1102 <sup>a,b,c,d</sup> | 1100 <sup>c</sup> | 0.12 (0.01)  | 0.15 (0.01)  | 0.13 (0.01)  | 0.08 (0.01)  | 0.09 (0.01)  | 0.10 (0.01)  |
| 12  | 3,4-dimethylcyclohexan-1-ol     | 1115 <sup>a,b</sup>     | 1126 <sup>a</sup> | 0.13 (0.01)  | 0.09 (0.01)  | 0.09 (0.01)  | 0.08 (0.01)  | 0.11 (0.01)  | 0.12 (0.01)  |
| 13  | phenylethanol                   | 1121 <sup>a,b</sup>     | 1121 <sup>a</sup> | 0.56 (0.02)  | 0.54 (0.02)  | 0.58 (0.03)  | 0.56 (0.03)  | 0.62 (0.03)  | 0.59 (0.03)  |
| 14  | decanal                         | 1195 <sup>a,b,c,d</sup> | 1201 <sup>c</sup> | 0.06 (0.01)  | 0.07 (0.01)  | 0.06 (0.01)  | 0.09 (0.01)  | 0.09 (0.01)  | 0.09 (0.01)  |
| 15  | β-cyclocitral                   | 1221 <sup>c</sup>       | 1217 <sup>c</sup> | 0.04 (0.01)  | 0.05 (0.01)  | 0.05 (0.01)  | 0.04 (0.01)  | 0.04 (0.01)  | 0.05 (0.01)  |
| 16  | 2-phenoxyethan-1-ol             | 1225 <sup>a,b</sup>     | 1226 <sup>a</sup> | 1.32 (0.04)  | 1.28 (0.03)  | 1.24 (0.05)  | 1.28 (0.05)  | 1.30 (0.04)  | 1.29 (0.02)  |
| 17  | bicycloelemene                  | 1316 <sup>a</sup>       | 1330 <sup>a</sup> | 0.09 (0.01)  | 0.09 (0.02)  | 0.08 (0.01)  | 0.08 (0.02)  | 0.10 (0.01)  | 0.09 (0.01)  |
| 18  | δ-elemene                       | 1324 <sup>a,b,c</sup>   | 1335 <sup>c</sup> | 0.68 (0.02)  | 0.73 (0.03)  | 0.65 (0.03)  | 0.68 (0.03)  | 0.70 (0.02)  | 0.72 (0.03)  |
| 19  | 204[M+](5) 121(100) 93(89)      | 1343                    | ND                | 0.12 (0.02)  | 0.12 (0.02)  | 0.12 (0.01)  | 0.14 (0.01)  | 0.13 (0.01)  | 0.15 (0.01)  |
| 20  | 200[M+](39) 159(100) 117(95)    | 1345                    | ND                | 1.31 (0.03)  | 1.21 (0.04)  | 1.29 (0.05)  | 1.26 (0.02)  | 1.21 (0.05)  | 1.23 (0.04)  |
| 21  | 202[M+](13) 81(100) 96(73)      | 1350                    | ND                | 0.11 (0.01)  | 0.11 (0.01)  | 0.11 (0.02)  | 0.12 (0.01)  | 0.09 (0.01)  | 0.09 (0.01)  |
| 22  | 204[M+](10) 119(100) 91(84)     | 1353                    | ND                | 0.10 (0.01)  | 0.08 (0.01)  | 0.08 (0.01)  | 0.09 (0.01)  | 0.11 (0.02)  | 0.09 (0.01)  |
| 23  | anastreptene                    | 1370 <sup>a</sup>       | 1370 <sup>a</sup> | 15.82 (0.06) | 15.83 (0.05) | 15.97 (0.06) | 15.69 (0.06) | 15.32 (0.04) | 15.58 (0.04) |
| 24  | 204[M+](5) 81(100) 93(96)       | 1384                    | ND                | 0.16 (0.01)  | 0.16 (0.03)  | 0.15 (0.01)  | 0.14 (0.02)  | 0.22 (0.02)  | 0.20 (0.01)  |
| 25  | β-elemene                       | 1391 <sup>a,b,c</sup>   | 1389 <sup>c</sup> | 1.23 (0.03)  | 1.31 (0.04)  | 1.28 (0.02)  | 1.26 (0.04)  | 1.26 (0.04)  | 1.26 (0.05)  |
| 26  | 204[M+](13) 157(100) 185(84)    | 1398                    | ND                | 0.24 (0.02)  | 0.27 (0.02)  | 0.19 (0.01)  | 0.21 (0.01)  | 0.22 (0.02)  | 0.26 (0.03)  |
| 27  | 204[M+](13) 157(100) 185(84)    | 1417                    | ND                | 0.31 (0.03)  | 0.31 (0.03)  | 0.33 (0.03)  | 0.33 (0.02)  | 0.36 (0.02)  | 0.35 (0.01)  |
| 28  | 204[M+](19) 135(100) 105(82)    | 1423                    | ND                | 0.13 (0.02)  | 0.13 (0.02)  | 0.11 (0.01)  | 0.11 (0.01)  | 0.13 (0.01)  | 0.19 (0.01)  |
| 29  | 204[M+](9) 91(100) 105(93)      | 1425                    | ND                | 0.06 (0.01)  | 0.05 (0.01)  | 0.02 (0.01)  | 0.02 (0.01)  | 0.06 (0.01)  | 0.05 (0.01)  |
| 30  | (-)-aristolene                  | 1429 <sup>a,b,c,d</sup> | 1428 <sup>a</sup> | 1.17 (0.03)  | 1.17 (0.02)  | 1.21 (0.04)  | 1.18 (0.04)  | 1.12 (0.03)  | 1.18 (0.03)  |
| 31  | 204[M+](9) 107(100) 79(43)      | 1432                    | ND                | 0.09 (0.01)  | 0.12 (0.01)  | 0.11 (0.02)  | 0.10 (0.02)  | 0.11 (0.02)  | 0.15 (0.02)  |
| 32  | γ-maaliene                      | 1435 <sup>a,b</sup>     | 1427 <sup>a</sup> | 0.17 (0.02)  | 0.26 (0.01)  | 0.26 (0.02)  | 0.25 (0.02)  | 0.19 (0.02)  | 0.21 (0.01)  |
| 33  | α-maaliene                      | 1443 <sup>a,b</sup>     | 1442 <sup>a</sup> | 0.23 (0.02)  | 0.27 (0.03)  | 0.18 (0.02)  | 0.22 (0.02)  | 0.25 (0.02)  | 0.28 (0.01)  |
| 34  | aromandendrene                  | 1445 <sup>a,b</sup>     | 1447 <sup>a</sup> | 3.18 (0.05)  | 3.22 (0.04)  | 3.22 (0.02)  | 3.23 (0.04)  | 3.19 (0.04)  | 3.34 (0.04)  |
| 35  | selina-5,11-diene               | 1447 <sup>a,b</sup>     | 1454 <sup>a</sup> | 0.27 (0.02)  | 0.34 (0.03)  | 0.34 (0.03)  | 0.25 (0.02)  | 0.29 (0.03)  | 0.28 (0.01)  |
| 36  | dehydroaromadendrene            | 1456 <sup>c</sup>       | 1460 <sup>c</sup> | 1.21 (0.02)  | 1.16 (0.02)  | 1.13 (0.04)  | 1.09 (0.04)  | 1.12 (0.04)  | 1.19 (0.04)  |
| 37  | 1,2,9,10-tetrahydroaristolane   | 1461                    | ND                | 0.52 (0.02)  | 0.56 (0.02)  | 0.46 (0.03)  | 0.52 (0.02)  | 0.46 (0.03)  | 0.51 (0.02)  |
| 38  | 204[M+](15) 91(100) 105(84)     | 1465                    | ND                | 0.27 (0.01)  | 0.26 (0.01)  | 0.24 (0.02)  | 0.28 (0.01)  | 0.31 (0.02)  | 0.33 (0.02)  |
| 39  | 204[M+](18) 128(100) 143(95)    | 1469                    | ND                | 0.34 (0.01)  | 0.37 (0.01)  | 0.36 (0.02)  | 0.36 (0.02)  | 0.35 (0.03)  | 0.29 (0.02)  |
| 40  | γ-gurjunene                     | 1474 <sup>c,d</sup>     | 1475 <sup>c</sup> | 0.29 (0.02)  | 0.28 (0.02)  | 0.33 (0.02)  | 0.34 (0.02)  | 0.33 (0.02)  | 0.29 (0.02)  |
| 41  | γ-murolene                      | 1477 <sup>c</sup>       | 1478 <sup>c</sup> | 0.11 (0.02)  | 0.09 (0.01)  | 0.09 (0.01)  | 0.11 (0.01)  | 0.09 (0.02)  | 0.14 (0.01)  |
| 42  | δ-selinene                      | 1488 <sup>c</sup>       | 1492 <sup>c</sup> | 1.01 (0.03)  | 1.03 (0.03)  | 0.99 (0.03)  | 1.06 (0.04)  | 1.11 (0.04)  | 1.09 (0.05)  |
| 43  | ledene                          | 1492 <sup>a,b,c</sup>   | 1496 <sup>c</sup> | 1.32 (0.03)  | 1.47 (0.04)  | 1.42 (0.02)  | 1.47 (0.03)  | 1.41 (0.05)  | 1.38 (0.04)  |
| 44  | 204[M+](38) 105(100) 93(96)     | 1495                    | ND                | 0.08 (0.02)  | 0.06 (0.01)  | 0.07 (0.01)  | 0.09 (0.01)  | 0.11 (0.01)  | 0.09 (0.02)  |
| 45  | bicyclogermacrene               | 1499 <sup>a,b,c</sup>   | 1500 <sup>c</sup> | 7.23 (0.03)  | 7.16 (0.05)  | 7.23 (0.03)  | 7.62 (0.04)  | 7.45 (0.04)  | 7.69 (0.05)  |
| 46  | 204[M+](19) 93(100) 91(95)      | 1505                    | ND                | 0.09 (0.01)  | 0.16 (0.01)  | 0.12 (0.01)  | 0.10 (0.01)  | 0.15 (0.02)  | 0.19 (0.01)  |
| 47  | 202[M+](25) 133(100) 91(89)     | 1509                    | ND                | 0.14 (0.01)  | 0.13 (0.01)  | 0.18 (0.01)  | 0.22 (0.02)  | 0.18 (0.03)  | 0.22 (0.02)  |
| 48  | 206[M+](14) 191(100) 57(38)     | 1514                    | ND                | 0.08 (0.01)  | 0.16 (0.02)  | 0.12 (0.01)  | 0.11 (0.01)  | 0.12 (0.01)  | 0.19 (0.04)  |
| 49  | 202[M+](33) 131(100) 145(53)    | 1518                    | ND                | 0.20 (0.02)  | 0.23 (0.02)  | 0.19 (0.01)  | 0.14 (0.01)  | 0.22 (0.02)  | 0.21 (0.02)  |
| 50  | δ-cadinene                      | 1524 <sup>a,b,c</sup>   | 1522 <sup>c</sup> | 0.32 (0.03)  | 0.33 (0.03)  | 0.32 (0.03)  | 0.32 (0.04)  | 0.34 (0.04)  | 0.30 (0.02)  |
| 51  | 204[M+](5) 91(100) 131(95)      | 1530                    | ND                | 0.12 (0.01)  | 0.06 (0.01)  | 0.08 (0.01)  | 0.09 (0.01)  | 0.12 (0.01)  | 0.09 (0.04)  |
| 52  | 200[M+](54) 185(100) 143(91)    | 1535                    | ND                | 0.18 (0.02)  | 0.14 (0.01)  | 0.20 (0.01)  | 0.19 (0.01)  | 0.18 (0.02)  | 0.25 (0.03)  |
| 53  | 4,5,9,10-dehydro-isolongifolene | 1544 <sup>a,b</sup>     | 1544 <sup>a</sup> | 8.67 (0.04)  | 8.32 (0.05)  | 8.23 (0.02)  | 8.37 (0.05)  | 8.53 (0.04)  | 8.54 (0.05)  |
| 54  | 202[M+](4) 128(100) 157(95)     | 1547                    | ND                | 1.43 (0.02)  | 1.55 (0.04)  | 1.43 (0.04)  | 1.53 (0.05)  | 1.57 (0.03)  | 1.54 (0.04)  |

|                              |                                               |                         |                   |              |              |              |              |              |              |
|------------------------------|-----------------------------------------------|-------------------------|-------------------|--------------|--------------|--------------|--------------|--------------|--------------|
| 55                           | 200[M+](8) 171(100) 186(79)                   | 1551                    | ND                | 0.18 (0.02)  | 0.19 (0.02)  | 0.22 (0.01)  | 0.21 (0.02)  | 0.17 (0.02)  | 0.24 (0.01)  |
| 56                           | 200[M+](91) 129(100) 157(88)                  | 1556                    | ND                | 0.09 (0.01)  | 0.12 (0.01)  | 0.11 (0.01)  | 0.11 (0.01)  | 0.11 (0.02)  | 0.09 (0.02)  |
| 57                           | 204[M+](8) 143(100) 157(98)                   | 1559                    | ND                | 0.05 (0.01)  | 0.05 (0.01)  | 0.06 (0.01)  | 0.05 (0.01)  | 0.05 (0.01)  | 0.07 (0.01)  |
| 58                           | 204[M+](82) 173(100) 189(94)                  | 1563                    | ND                | 1.64 (0.05)  | 1.58 (0.02)  | 1.54 (0.04)  | 1.62 (0.03)  | 1.61 (0.04)  | 1.56 (0.04)  |
| 59                           | palustrol                                     | 1567 <sup>c</sup>       | 1567 <sup>c</sup> | 9.87 (0.05)  | 9.81 (0.05)  | 9.83 (0.05)  | 9.83 (0.03)  | 9.92 (0.04)  | 9.83 (0.05)  |
| 60                           | 200[M+](11) 79(100) 93(95)                    | 1570                    | ND                | 0.47 (0.03)  | 0.53 (0.03)  | 0.48 (0.02)  | 0.51 (0.04)  | 0.52 (0.02)  | 0.47 (0.03)  |
| 61                           | 204[M+](31) 81(100) 109(88)                   | 1573                    | ND                | 0.89 (0.02)  | 0.94 (0.02)  | 0.95 (0.03)  | 0.92 (0.03)  | 0.89 (0.02)  | 0.86 (0.06)  |
| 62                           | spathulenol                                   | 1576 <sup>a,b,c</sup>   | 1577 <sup>c</sup> | 5.03 (0.04)  | 5.01 (0.03)  | 5.03 (0.04)  | 4.97 (0.03)  | 5.02 (0.05)  | 4.96 (0.03)  |
| 63                           | 200[M+](56) 185(100) 143(63)                  | 1581                    | ND                | 5.36 (0.05)  | 5.39 (0.05)  | 5.38 (0.03)  | 5.42 (0.05)  | 5.62 (0.06)  | 5.39 (0.04)  |
| 64                           | 202[M+](4) 91(100) 79(82)                     | 1587                    | ND                | 0.47 (0.02)  | 0.45 (0.02)  | 0.43 (0.02)  | 0.44 (0.02)  | 0.48 (0.02)  | 0.49 (0.02)  |
| 65                           | globulol                                      | 1599 <sup>a,b,c,d</sup> | 1590 <sup>c</sup> | 3.02 (0.04)  | 3.12 (0.02)  | 2.98 (0.03)  | 3.01 (0.02)  | 2.97 (0.04)  | 3.01 (0.05)  |
| 66                           | 200[M+](8) 198(100) 183(84)                   | 1605                    | ND                | 0.31 (0.01)  | 0.24 (0.01)  | 0.18 (0.01)  | 0.23 (0.01)  | 0.28 (0.01)  | 0.26 (0.02)  |
| 67                           | 220[M+](2) 145(100) 200(93)                   | 1609                    | ND                | 2.04 (0.02)  | 2.11 (0.03)  | 2.21 (0.02)  | 2.12 (0.02)  | 2.03 (0.05)  | 2.11 (0.06)  |
| 68                           | (+)-bisabola-2,10-diene[1,9]oxide             | 1615 <sup>a,b</sup>     | 1596 <sup>a</sup> | 0.22 (0.02)  | 0.12 (0.01)  | 0.15 (0.01)  | 0.18 (0.05)  | 0.22 (0.01)  | 0.21 (0.01)  |
| 69                           | 208[M+](3) 95(100) 85(95)                     | 1621                    | ND                | 1.44 (0.03)  | 1.36 (0.04)  | 1.12 (0.04)  | 1.18 (0.05)  | 1.36 (0.06)  | 1.52 (0.03)  |
| 70                           | ledene oxide-(II)                             | 1631 <sup>a,b</sup>     | 1631 <sup>a</sup> | 0.22 (0.01)  | 0.21 (0.02)  | 0.27 (0.02)  | 0.18 (0.01)  | 0.18 (0.02)  | 0.18 (0.02)  |
| 71                           | isospathulenol                                | 1635 <sup>a,b</sup>     | 1633 <sup>a</sup> | 0.86 (0.03)  | 0.89 (0.02)  | 0.99 (0.04)  | 0.98 (0.03)  | 0.88 (0.03)  | 0.87 (0.02)  |
| 72                           | 220[M+](18) 91(100) 105(83)                   | 1639                    | ND                | 1.66 (0.03)  | 1.51 (0.03)  | 1.58 (0.03)  | 1.58 (0.04)  | 1.62 (0.05)  | 1.52 (0.03)  |
| 73                           | cubenol                                       | 1642 <sup>a,b,c,d</sup> | 1645 <sup>c</sup> | 0.54 (0.02)  | 0.42 (0.02)  | 0.55 (0.02)  | 0.46 (0.02)  | 0.42 (0.02)  | 0.39 (0.02)  |
| 74                           | 220[M+](21) 91(100) 105(82)                   | 1651                    | ND                | 0.10 (0.01)  | 0.07 (0.01)  | 0.08 (0.02)  | 0.09 (0.02)  | 0.08 (0.01)  | 0.10 (0.02)  |
| 75                           | 222[M+](3) 179(100) 121(92)                   | 1655                    | ND                | 0.05 (0.01)  | 0.04 (0.01)  | 0.03 (0.01)  | 0.02 (0.01)  | 0.04 (0.01)  | 0.04 (0.01)  |
| 76                           | germacra-4(15),5,10(14)-trien-1- $\alpha$ -ol | 1660 <sup>c</sup>       | 1685 <sup>c</sup> | 0.86 (0.02)  | 0.97 (0.02)  | 1.05 (0.04)  | 0.98 (0.03)  | 0.96 (0.02)  | 0.98 (0.04)  |
| 77                           | 216[M+](31) 145(100) 91(97)                   | 1699                    | ND                | 0.56 (0.02)  | 0.66 (0.03)  | 0.58 (0.02)  | 0.57 (0.02)  | 0.62 (0.03)  | 0.64 (0.05)  |
| 78                           | 1,4-dimethyl-7-(1-methylethyl)-azulene        | 1790 <sup>c</sup>       | 1779 <sup>c</sup> | 3.42 (0.06)  | 3.24 (0.05)  | 3.15 (0.03)  | 3.36 (0.03)  | 3.31 (0.02)  | 3.52 (0.06)  |
| 79                           | 14-hydroxy- $\delta$ -cadinene                | 1797 <sup>c</sup>       | 1803 <sup>c</sup> | 0.28 (0.01)  | 0.38 (0.02)  | 0.43 (0.05)  | 0.40 (0.01)  | 0.43 (0.03)  | 0.34 (0.02)  |
| Total                        |                                               |                         |                   | 96.87 (1.77) | 96.82 (1.78) | 96.29 (1.79) | 96.82 (1.85) | 97.08 (2.02) | 98.14 (2.07) |
| % Identified                 |                                               |                         |                   | 76.00 (1.12) | 75.90 (1.09) | 75.84 (1.14) | 76.12 (1.17) | 75.65 (1.20) | 76.62 (1.20) |
| Including:                   |                                               |                         |                   |              |              |              |              |              |              |
| Aliphatics                   |                                               |                         |                   | 2.99 (0.16)  | 2.91 (0.14)  | 2.96 (0.16)  | 2.96 (0.15)  | 2.91 (0.18)  | 3.08 (0.18)  |
| Aromatics                    |                                               |                         |                   | 5.08 (0.14)  | 5.10 (0.13)  | 4.96 (0.15)  | 5.00 (0.16)  | 5.09 (0.15)  | 5.09 (0.15)  |
| Monoterpene hydrocarbons     |                                               |                         |                   | 0.05 (0.01)  | 0.05 (0.01)  | 0.05 (0.01)  | 0.03 (0.01)  | 0.04 (0.01)  | 0.04 (0.01)  |
| Monoterpenoid hydrocarbons   |                                               |                         |                   | 0.04 (0.01)  | 0.05 (0.01)  | 0.05 (0.01)  | 0.04 (0.01)  | 0.04 (0.01)  | 0.05 (0.01)  |
| Sesquiterpene hydrocarbons   |                                               |                         |                   | 46.94 (0.56) | 46.86 (0.59) | 46.54 (0.51) | 47.10 (0.61) | 46.57 (0.59) | 47.59 (0.59) |
| Sesquiterpenoid hydrocarbons |                                               |                         |                   | 20.90 (0.24) | 20.93 (0.21) | 21.28 (0.30) | 20.99 (0.23) | 21.00 (0.26) | 20.77 (0.26) |

- less than 0.01%. \* The names of terpenes and terpenoids according to IUPAC terminology are given in Table S5. \*\* Retention index on Quadex 007-5MS column. \*\*\* Literature retention index. ND No data. \*\*\*\* For abbreviations of samples see Table 1. ( ) standard deviation. Identification of compounds by MS databases (<sup>a</sup> - NIST 2011, <sup>b</sup> - NIST Chemistry WebBook, <sup>c</sup> - Adams 4 Library, <sup>d</sup> - Pherobase).

**Table S4b.** Volatile compounds detected in the samples collected in autumn (CI-69 – CI-74).

| No. | Compounds*                      | RI**                    | RI***             | Code****     |              |              |              |              |              |
|-----|---------------------------------|-------------------------|-------------------|--------------|--------------|--------------|--------------|--------------|--------------|
|     |                                 |                         |                   | CI-69        | CI-70        | CI-71        | CI-72        | CI-73        | CI-74        |
| 1   | propan-1-ol                     | <700 <sup>a,b</sup>     | 483 <sup>a</sup>  | 1.30 (0.03)  | 1.39 (0.04)  | 1.29 (0.05)  | 1.32 (0.03)  | 1.25 (0.04)  | 1.37 (0.05)  |
| 2   | pentanal                        | 705 <sup>a,b,c,d</sup>  | 704 <sup>c</sup>  | 0.42 (0.02)  | 0.39 (0.03)  | 0.42 (0.03)  | 0.48 (0.02)  | 0.44 (0.03)  | 0.45 (0.02)  |
| 3   | hexanal                         | 802 <sup>a,b,c,d</sup>  | 801 <sup>c</sup>  | 0.41 (0.02)  | 0.44 (0.03)  | 0.43 (0.02)  | 0.42 (0.02)  | 0.38 (0.02)  | 0.34 (0.03)  |
| 4   | hexan-1-ol                      | 867 <sup>a,b</sup>      | 869 <sup>a</sup>  | 0.29 (0.03)  | 0.29 (0.03)  | 0.27 (0.03)  | 0.31 (0.03)  | 0.28 (0.02)  | 0.28 (0.02)  |
| 5   | heptanal                        | 902 <sup>a,b,c,d</sup>  | 901 <sup>c</sup>  | 0.03 (0.01)  | 0.03 (0.01)  | 0.06 (0.01)  | 0.02 (0.01)  | 0.05 (0.01)  | 0.04 (0.01)  |
| 6   | α-pinene                        | 939 <sup>a,b,c</sup>    | 932 <sup>c</sup>  | 0.05 (0.01)  | 0.04 (0.01)  | 0.04 (0.01)  | 0.04 (0.01)  | 0.06 (0.01)  | 0.06 (0.01)  |
| 7   | benzaldehyde                    | 940 <sup>a,b,c</sup>    | 952 <sup>c</sup>  | 0.49 (0.02)  | 0.52 (0.03)  | 0.51 (0.04)  | 0.49 (0.03)  | 0.52 (0.03)  | 0.49 (0.02)  |
| 8   | 2-ethylhexan-1-ol               | 1023 <sup>a,b</sup>     | 1025 <sup>a</sup> | 0.25 (0.02)  | 0.21 (0.02)  | 0.23 (0.02)  | 0.21 (0.03)  | 0.23 (0.02)  | 0.23 (0.03)  |
| 9   | phenylmethanol                  | 1028 <sup>a,b,c</sup>   | 1026 <sup>c</sup> | 1.12 (0.04)  | 1.13 (0.04)  | 1.06 (0.03)  | 1.06 (0.04)  | 0.98 (0.02)  | 0.99 (0.04)  |
| 10  | phenylacetaldehyde              | 1044 <sup>a,b</sup>     | 1044 <sup>a</sup> | 1.65 (0.03)  | 1.71 (0.05)  | 1.59 (0.03)  | 1.65 (0.05)  | 1.65 (0.04)  | 1.76 (0.05)  |
| 11  | nonanal                         | 1102 <sup>a,b,c,d</sup> | 1100 <sup>c</sup> | 0.12 (0.01)  | 0.13 (0.02)  | 0.15 (0.01)  | 0.13 (0.02)  | 0.14 (0.02)  | 0.13 (0.03)  |
| 12  | 3,4-dimethylcyclohexan-1-ol     | 1115 <sup>a,b</sup>     | 1126 <sup>a</sup> | 0.09 (0.01)  | 0.09 (0.01)  | 0.11 (0.01)  | 0.10 (0.03)  | 0.11 (0.01)  | 0.12 (0.01)  |
| 13  | phenylethanol                   | 1121 <sup>a,b</sup>     | 1121 <sup>a</sup> | 0.60 (0.02)  | 0.61 (0.04)  | 0.59 (0.03)  | 0.59 (0.03)  | 0.62 (0.03)  | 0.56 (0.02)  |
| 14  | decanal                         | 1195 <sup>a,b,c,d</sup> | 1201 <sup>c</sup> | 0.11 (0.02)  | 0.08 (0.02)  | 0.07 (0.01)  | 0.08 (0.01)  | 0.07 (0.01)  | 0.06 (0.01)  |
| 15  | β-cyclocitral                   | 1221 <sup>c</sup>       | 1217 <sup>c</sup> | 0.07 (0.01)  | 0.06 (0.01)  | 0.04 (0.01)  | 0.04 (0.01)  | 0.05 (0.01)  | 0.05 (0.01)  |
| 16  | 2-phenoxyethan-1-ol             | 1225 <sup>a,b</sup>     | 1226 <sup>a</sup> | 1.37 (0.05)  | 1.22 (0.02)  | 1.25 (0.04)  | 1.28 (0.03)  | 1.31 (0.02)  | 1.34 (0.04)  |
| 17  | bicycloelemene                  | 1316 <sup>a</sup>       | 1330 <sup>a</sup> | 0.07 (0.02)  | 0.09 (0.01)  | 0.06 (0.01)  | 0.06 (0.01)  | 0.05 (0.01)  | 0.09 (0.02)  |
| 18  | δ-elemene                       | 1324 <sup>a,b,c</sup>   | 1335 <sup>c</sup> | 0.69 (0.05)  | 0.69 (0.02)  | 0.73 (0.03)  | 0.70 (0.02)  | 0.73 (0.04)  | 0.72 (0.05)  |
| 19  | 204[M+](5) 121(100) 93(89)      | 1343                    | ND                | 0.13 (0.01)  | 0.11 (0.01)  | 0.12 (0.01)  | 0.12 (0.02)  | 0.14 (0.01)  | 0.13 (0.01)  |
| 20  | 200[M+](39) 159(100) 117(95)    | 1345                    | ND                | 1.33 (0.03)  | 1.33 (0.06)  | 1.32 (0.03)  | 1.25 (0.04)  | 1.27 (0.05)  | 1.22 (0.03)  |
| 21  | 202[M+](13) 81(100) 96(73)      | 1350                    | ND                | 0.12 (0.01)  | 0.15 (0.02)  | 0.14 (0.02)  | 0.14 (0.02)  | 0.15 (0.03)  | 0.08 (0.04)  |
| 22  | 204[M+](10) 119(100) 91(84)     | 1353                    | ND                | 0.08 (0.01)  | 0.11 (0.02)  | 0.11 (0.02)  | 0.13 (0.02)  | 0.12 (0.02)  | 0.11 (0.01)  |
| 23  | anastreptene                    | 1370 <sup>a</sup>       | 1370 <sup>a</sup> | 15.69 (0.05) | 15.62 (0.04) | 15.31 (0.04) | 15.93 (0.06) | 15.63 (0.05) | 15.97 (0.06) |
| 24  | 204[M+](5) 81(100) 93(96)       | 1384                    | ND                | 0.18 (0.02)  | 0.19 (0.02)  | 0.16 (0.01)  | 0.13 (0.03)  | 0.15 (0.02)  | 0.18 (0.03)  |
| 25  | β-elemene                       | 1391 <sup>a,b,c</sup>   | 1389 <sup>c</sup> | 1.29 (0.04)  | 1.29 (0.03)  | 1.31 (0.03)  | 1.26 (0.02)  | 1.28 (0.05)  | 1.27 (0.04)  |
| 26  | 204[M+](13) 157(100) 185(84)    | 1398                    | ND                | 0.25 (0.02)  | 0.21 (0.01)  | 0.22 (0.01)  | 0.19 (0.02)  | 0.17 (0.04)  | 0.19 (0.03)  |
| 27  | 204[M+](13) 157(100) 185(84)    | 1417                    | ND                | 0.30 (0.02)  | 0.32 (0.02)  | 0.32 (0.02)  | 0.35 (0.04)  | 0.39 (0.03)  | 0.36 (0.02)  |
| 28  | 204[M+](19) 135(100) 105(82)    | 1423                    | ND                | 0.18 (0.01)  | 0.16 (0.01)  | 0.17 (0.01)  | 0.14 (0.02)  | 0.15 (0.04)  | 0.16 (0.03)  |
| 29  | 204[M+](9) 91(100) 105(93)      | 1425                    | ND                | 0.04 (0.01)  | 0.03 (0.01)  | 0.03 (0.01)  | 0.02 (0.01)  | 0.03 (0.01)  | 0.02 (0.01)  |
| 30  | (-)-aristolene                  | 1429 <sup>a,b,c,d</sup> | 1428 <sup>a</sup> | 1.21 (0.03)  | 1.23 (0.04)  | 1.23 (0.04)  | 1.24 (0.04)  | 1.19 (0.03)  | 1.22 (0.03)  |
| 31  | 204[M+](9) 107(100) 79(43)      | 1432                    | ND                | 0.15 (0.02)  | 0.11 (0.02)  | 0.11 (0.01)  | 0.09 (0.02)  | 0.10 (0.02)  | 0.13 (0.02)  |
| 32  | γ-maaliene                      | 1435 <sup>a,b</sup>     | 1427 <sup>a</sup> | 0.19 (0.02)  | 0.24 (0.04)  | 0.26 (0.02)  | 0.26 (0.02)  | 0.27 (0.03)  | 0.26 (0.02)  |
| 33  | α-maaliene                      | 1443 <sup>a,b</sup>     | 1442 <sup>a</sup> | 0.33 (0.03)  | 0.23 (0.03)  | 0.20 (0.02)  | 0.27 (0.03)  | 0.19 (0.04)  | 0.22 (0.03)  |
| 34  | aromandendrene                  | 1445 <sup>a,b</sup>     | 1447 <sup>a</sup> | 3.47 (0.02)  | 3.28 (0.04)  | 3.27 (0.04)  | 3.36 (0.05)  | 3.32 (0.03)  | 3.42 (0.04)  |
| 35  | selina-5,11-diene               | 1447 <sup>a,b</sup>     | 1454 <sup>a</sup> | 0.32 (0.02)  | 0.29 (0.02)  | 0.26 (0.02)  | 0.27 (0.02)  | 0.30 (0.02)  | 0.31 (0.02)  |
| 36  | dehydroaromadendrene            | 1456 <sup>c</sup>       | 1460 <sup>c</sup> | 1.23 (0.05)  | 1.26 (0.05)  | 1.16 (0.05)  | 1.22 (0.03)  | 1.14 (0.03)  | 1.16 (0.04)  |
| 37  | 1,2,9,10-tetrahydroaristolane   | 1461                    | ND                | 0.52 (0.02)  | 0.50 (0.04)  | 0.49 (0.03)  | 0.47 (0.03)  | 0.49 (0.02)  | 0.52 (0.03)  |
| 38  | 204[M+](15) 91(100) 105(84)     | 1465                    | ND                | 0.31 (0.02)  | 0.32 (0.02)  | 0.37 (0.04)  | 0.32 (0.02)  | 0.34 (0.03)  | 0.32 (0.03)  |
| 39  | 204[M+](18) 128(100) 143(95)    | 1469                    | ND                | 0.29 (0.01)  | 0.38 (0.03)  | 0.40 (0.02)  | 0.33 (0.02)  | 0.31 (0.02)  | 0.36 (0.02)  |
| 40  | γ-gurjunene                     | 1474 <sup>c,d</sup>     | 1475 <sup>c</sup> | 0.28 (0.01)  | 0.33 (0.04)  | 0.32 (0.03)  | 0.29 (0.03)  | 0.27 (0.03)  | 0.28 (0.02)  |
| 41  | γ-murolene                      | 1477 <sup>c</sup>       | 1478 <sup>c</sup> | 0.11 (0.02)  | 0.13 (0.02)  | 0.08 (0.01)  | 0.14 (0.02)  | 0.16 (0.01)  | 0.09 (0.01)  |
| 42  | δ-selinene                      | 1488 <sup>c</sup>       | 1492 <sup>c</sup> | 1.07 (0.03)  | 0.97 (0.04)  | 0.99 (0.01)  | 0.96 (0.02)  | 1.05 (0.05)  | 1.01 (0.05)  |
| 43  | ledene                          | 1492 <sup>a,b,c</sup>   | 1496 <sup>c</sup> | 1.34 (0.03)  | 1.43 (0.03)  | 1.42 (0.02)  | 1.36 (0.02)  | 1.39 (0.03)  | 1.35 (0.04)  |
| 44  | 204[M+](38) 105(100) 93(96)     | 1495                    | ND                | 0.06 (0.01)  | 0.09 (0.01)  | 0.09 (0.01)  | 0.09 (0.03)  | 0.08 (0.01)  | 0.06 (0.01)  |
| 45  | bicyclogermacrene               | 1499 <sup>a,b,c</sup>   | 1500 <sup>c</sup> | 7.56 (0.04)  | 7.76 (0.03)  | 7.67 (0.06)  | 7.68 (0.02)  | 7.56 (0.04)  | 7.43 (0.05)  |
| 46  | 204[M+](19) 93(100) 91(95)      | 1505                    | ND                | 0.20 (0.02)  | 0.16 (0.01)  | 0.14 (0.02)  | 0.12 (0.01)  | 0.16 (0.02)  | 0.12 (0.01)  |
| 47  | 202[M+](25) 133(100) 91(89)     | 1509                    | ND                | 0.23 (0.03)  | 0.17 (0.01)  | 0.23 (0.04)  | 0.24 (0.01)  | 0.23 (0.04)  | 0.18 (0.01)  |
| 48  | 206[M+](14) 191(100) 57(38)     | 1514                    | ND                | 0.18 (0.02)  | 0.14 (0.01)  | 0.09 (0.02)  | 0.13 (0.02)  | 0.12 (0.01)  | 0.17 (0.02)  |
| 49  | 202[M+](33) 131(100) 145(53)    | 1518                    | ND                | 0.16 (0.02)  | 0.21 (0.02)  | 0.22 (0.02)  | 0.22 (0.03)  | 0.25 (0.02)  | 0.20 (0.03)  |
| 50  | δ-cadinene                      | 1524 <sup>a,b,c</sup>   | 1522 <sup>c</sup> | 0.33 (0.02)  | 0.32 (0.02)  | 0.34 (0.02)  | 0.34 (0.02)  | 0.36 (0.03)  | 0.29 (0.02)  |
| 51  | 204[M+](5) 91(100) 131(95)      | 1530                    | ND                | 0.08 (0.01)  | 0.09 (0.01)  | 0.10 (0.01)  | 0.07 (0.01)  | 0.11 (0.01)  | 0.09 (0.01)  |
| 52  | 200[M+](54) 185(100) 143(91)    | 1535                    | ND                | 0.19 (0.02)  | 0.17 (0.01)  | 0.23 (0.02)  | 0.19 (0.01)  | 0.24 (0.01)  | 0.17 (0.03)  |
| 53  | 4,5,9,10-dehydro-isolongifolene | 1544 <sup>a,b</sup>     | 1544 <sup>a</sup> | 8.69 (0.05)  | 8.48 (0.04)  | 8.75 (0.05)  | 8.59 (0.05)  | 8.61 (0.04)  | 8.33 (0.04)  |
| 54  | 202[M+](4) 128(100) 157(95)     | 1547                    | ND                | 1.47 (0.03)  | 1.52 (0.03)  | 1.47 (0.03)  | 1.53 (0.04)  | 1.55 (0.04)  | 1.49 (0.03)  |



|                              |                                               |                         |                   |              |              |              |              |              |              |
|------------------------------|-----------------------------------------------|-------------------------|-------------------|--------------|--------------|--------------|--------------|--------------|--------------|
| 55                           | 200[M+](8) 171(100) 186(79)                   | 1551                    | ND                | 0.21 (0.02)  | 0.20 (0.03)  | 0.19 (0.02)  | 0.22 (0.01)  | 0.24 (0.02)  | 0.18 (0.02)  |
| 56                           | 200[M+](91) 129(100) 157(88)                  | 1556                    | ND                | 0.12 (0.02)  | 0.14 (0.02)  | 0.08 (0.01)  | 0.09 (0.02)  | 0.08 (0.01)  | 0.09 (0.01)  |
| 57                           | 204[M+](8) 143(100) 157(98)                   | 1559                    | ND                | 0.09 (0.01)  | 0.06 (0.01)  | 0.06 (0.01)  | 0.08 (0.01)  | 0.06 (0.03)  | 0.06 (0.01)  |
| 58                           | 204[M+](82) 173(100) 189(94)                  | 1563                    | ND                | 1.59 (0.03)  | 1.62 (0.05)  | 1.62 (0.04)  | 1.57 (0.02)  | 1.58 (0.02)  | 1.55 (0.02)  |
| 59                           | palustrol                                     | 1567 <sup>c</sup>       | 1567 <sup>c</sup> | 9.90 (0.03)  | 9.85 (0.05)  | 9.85 (0.05)  | 9.83 (0.04)  | 9.86 (0.06)  | 9.83 (0.05)  |
| 60                           | 200[M+](11) 79(100) 93(95)                    | 1570                    | ND                | 0.55 (0.04)  | 0.49 (0.02)  | 0.49 (0.03)  | 0.48 (0.02)  | 0.48 (0.04)  | 0.52 (0.03)  |
| 61                           | 204[M+](31) 81(100) 109(88)                   | 1573                    | ND                | 0.91 (0.03)  | 0.89 (0.03)  | 0.91 (0.02)  | 0.94 (0.03)  | 0.93 (0.03)  | 0.92 (0.02)  |
| 62                           | spathulenol                                   | 1576 <sup>a,b,c</sup>   | 1577 <sup>c</sup> | 5.13 (0.03)  | 5.01 (0.04)  | 5.06 (0.04)  | 4.97 (0.06)  | 5.01 (0.03)  | 5.06 (0.05)  |
| 63                           | 200[M+](56) 185(100) 143(63)                  | 1581                    | ND                | 5.23 (0.05)  | 5.48 (0.04)  | 5.44 (0.03)  | 5.39 (0.03)  | 5.28 (0.04)  | 5.38 (0.04)  |
| 64                           | 202[M+](4) 91(100) 79(82)                     | 1587                    | ND                | 0.47 (0.03)  | 0.46 (0.03)  | 0.43 (0.02)  | 0.49 (0.02)  | 0.49 (0.02)  | 0.44 (0.02)  |
| 65                           | globulol                                      | 1599 <sup>a,b,c,d</sup> | 1590 <sup>c</sup> | 3.13 (0.02)  | 3.09 (0.03)  | 3.08 (0.05)  | 3.07 (0.03)  | 3.09 (0.03)  | 3.13 (0.03)  |
| 66                           | 200[M+](8) 198(100) 183(84)                   | 1605                    | ND                | 0.23 (0.01)  | 0.27 (0.02)  | 0.23 (0.02)  | 0.22 (0.03)  | 0.26 (0.02)  | 0.31 (0.02)  |
| 67                           | 220[M+](2) 145(100) 200(93)                   | 1609                    | ND                | 2.15 (0.02)  | 2.14 (0.03)  | 2.09 (0.04)  | 2.08 (0.04)  | 2.22 (0.05)  | 2.14 (0.06)  |
| 68                           | (+)-bisabola-2,10-diene[1,9]oxide             | 1615 <sup>a,b</sup>     | 1596 <sup>a</sup> | 0.19 (0.02)  | 0.17 (0.02)  | 0.19 (0.02)  | 0.17 (0.02)  | 0.14 (0.03)  | 0.22 (0.03)  |
| 69                           | 208[M+](3) 95(100) 85(95)                     | 1621                    | ND                | 1.46 (0.03)  | 1.43 (0.04)  | 1.19 (0.06)  | 1.16 (0.03)  | 1.17 (0.04)  | 1.26 (0.04)  |
| 70                           | ledene oxide-(II)                             | 1631 <sup>a,b</sup>     | 1631 <sup>a</sup> | 0.21 (0.01)  | 0.25 (0.01)  | 0.19 (0.01)  | 0.27 (0.02)  | 0.19 (0.03)  | 0.24 (0.03)  |
| 71                           | isospathulenol                                | 1635 <sup>a,b</sup>     | 1633 <sup>a</sup> | 0.96 (0.02)  | 0.87 (0.03)  | 0.89 (0.02)  | 0.98 (0.03)  | 1.01 (0.03)  | 0.88 (0.02)  |
| 72                           | 220[M+](18) 91(100) 105(83)                   | 1639                    | ND                | 1.54 (0.04)  | 1.61 (0.02)  | 1.53 (0.05)  | 1.54 (0.02)  | 1.57 (0.04)  | 1.64 (0.04)  |
| 73                           | cubenol                                       | 1642 <sup>a,b,c,d</sup> | 1645 <sup>c</sup> | 0.42 (0.03)  | 0.51 (0.03)  | 0.42 (0.03)  | 0.39 (0.02)  | 0.39 (0.03)  | 0.49 (0.02)  |
| 74                           | 220[M+](21) 91(100) 105(82)                   | 1651                    | ND                | 0.09 (0.01)  | 0.08 (0.02)  | 0.07 (0.01)  | 0.08 (0.01)  | 0.10 (0.02)  | 0.07 (0.02)  |
| 75                           | 222[M+](3) 179(100) 121(92)                   | 1655                    | ND                | 0.05 (0.01)  | 0.06 (0.01)  | 0.04 (0.01)  | 0.04 (0.02)  | 0.03 (0.01)  | 0.04 (0.01)  |
| 76                           | germacra-4(15),5,10(14)-trien-1- $\alpha$ -ol | 1660 <sup>c</sup>       | 1685 <sup>c</sup> | 0.92 (0.03)  | 0.96 (0.03)  | 0.98 (0.02)  | 1.06 (0.03)  | 0.98 (0.02)  | 0.96 (0.02)  |
| 77                           | 216[M+](31) 145(100) 91(97)                   | 1699                    | ND                | 0.68 (0.02)  | 0.62 (0.04)  | 0.57 (0.03)  | 0.55 (0.05)  | 0.67 (0.03)  | 0.58 (0.04)  |
| 78                           | 1,4-dimethyl-7-(1-methylethyl)-azulene        | 1790 <sup>c</sup>       | 1779 <sup>c</sup> | 3.45 (0.04)  | 3.34 (0.02)  | 3.38 (0.03)  | 3.41 (0.06)  | 3.42 (0.03)  | 3.24 (0.03)  |
| 79                           | 14-hydroxy- $\delta$ -cadinene                | 1797 <sup>c</sup>       | 1803 <sup>c</sup> | 0.36 (0.02)  | 0.43 (0.03)  | 0.37 (0.02)  | 0.31 (0.03)  | 0.27 (0.02)  | 0.38 (0.02)  |
| Total                        |                                               |                         |                   | 98.73 (1.87) | 98.48 (2.05) | 97.35 (1.98) | 97.81 (2.05) | 97.71 (2.13) | 97.56 (2.14) |
| % Identified                 |                                               |                         |                   | 77.43 (1.15) | 76.96 (1.28) | 76.37 (1.20) | 77.08 (1.25) | 76.49 (1.23) | 76.64 (1.31) |
| Including:                   |                                               |                         |                   |              |              |              |              |              |              |
| Aliphatics                   |                                               |                         |                   | 3.02 (0.17)  | 3.05 (0.21)  | 3.03 (0.19)  | 3.07 (0.20)  | 2.95 (0.18)  | 3.02 (0.21)  |
| Aromatics                    |                                               |                         |                   | 5.23 (0.16)  | 5.19 (0.18)  | 5.00 (0.17)  | 5.07 (0.18)  | 5.08 (0.14)  | 5.14 (0.17)  |
| Monoterpene hydrocarbons     |                                               |                         |                   | 0.05 (0.01)  | 0.04 (0.01)  | 0.04 (0.01)  | 0.04 (0.01)  | 0.06 (0.01)  | 0.06 (0.01)  |
| Monoterpenoid hydrocarbons   |                                               |                         |                   | 0.07 (0.01)  | 0.06 (0.01)  | 0.04 (0.01)  | 0.04 (0.01)  | 0.05 (0.01)  | 0.05 (0.01)  |
| Sesquiterpene hydrocarbons   |                                               |                         |                   | 47.84 (0.59) | 47.48 (0.60) | 47.23 (0.56) | 47.81 (0.57) | 47.41 (0.61) | 47.18 (0.64) |
| Sesquiterpenoid hydrocarbons |                                               |                         |                   | 21.22 (0.21) | 21.14 (0.27) | 21.03 (0.26) | 21.05 (0.28) | 20.94 (0.28) | 21.19 (0.27) |

- less than 0.01%. \* The names of terpenes and terpenoids according to IUPAC terminology are given in Table S5. \*\* Retention index on Quadex 007-5MS column. \*\*\* Literature retention index. ND No data. \*\*\*\* For abbreviations of samples see Table 1. ( ) standard deviation. Identification of compounds by MS databases (<sup>a</sup> - NIST 2011, <sup>b</sup> - NIST Chemistry WebBook, <sup>c</sup> - Adams 4 Library, <sup>d</sup> - Pherobase).

**Table S5.** IUPAC name for detected terpenes and terpenoids.

| No.* | Compounds                                     |                                                                                                          |
|------|-----------------------------------------------|----------------------------------------------------------------------------------------------------------|
|      | Name                                          | IUPAC name                                                                                               |
| 6    | $\alpha$ -pinene                              | (1R,5R)-2,6,6-trimetylobicyclo[3.1.1]hept-2-en                                                           |
| 15   | $\beta$ -cyclocitral                          | 2,6,6-trimethylcyclohex-1-ene-1-carbaldehyde                                                             |
| 17   | bicycloelemene                                | 3-ethenyl-3,7,7-trimethyl-2-prop-1-en-2-ylbicyclo[4.1.0]heptane                                          |
| 18   | $\delta$ -elemene                             | (3R,4R)-1-isopropyl-4-methyl-3-(prop-1-en-2-yl)-4-vinylcyclohex-1-ene                                    |
| 23   | anastreptene                                  | (1R,2S,4R)-3,3,7,11-tetramethyltetracyclo[5.4.0.0 <sup>1,8</sup> .0 <sup>2,4</sup> ]undec-10-ene         |
| 25   | $\beta$ -elemene                              | (1S,2S,4R)-1-methyl-2,4-di(prop-1-en-2-yl)-1-vinylcyclohexane                                            |
| 30   | (-)-aristolene                                | 1,1,7,7a-tetramethyl-1H,1aH,2H,4H,5H,6H,7H,7aH,7bH-cyclopropa[a]naphthalene                              |
| 32   | $\gamma$ -maaliene                            | (1aS,3aR,7aS,7bS)-1,1,3a-trimethyl-7-methylidene-1a,2,3,4,5,6,7a,7b-octahydrocyclopropa[a]naphthalene    |
| 33   | $\alpha$ -maaliene                            | (1aS,3aR,7aR,7bS)-1,1,3a,7-tetramethyl-2,3,4,5,7a,7b-hexahydro-1aH-cyclopropa[a]naphthalene              |
| 34   | aromandendrene                                | 1,1,7-trimethyl-4-methylidene-2,3,4a,5,6,7,7a,7b-octahydro-1aH-cyclopropa[e]azulene                      |
| 35   | selina-5,11-diene                             | (4aR)-1,4a-dimethyl-7-prop-1-en-2-yl-2,3,4,5,6,7-hexahydro-1H-naphthalene                                |
| 36   | dehydroaromadendrene                          | 1,1,7-trimethyl-4-methylidene-4a,5,6,7,7a,7b-hexahydro-1aH-cyclopropa[e]azulene                          |
| 37   | 1,2,9,10-tetrahydroaristolane                 | 1,1,7,7a-tetramethyl-1a,2,6,7,7a,7b-hexahydro-1H-cyclopropa[a]naphthalene                                |
| 40   | $\gamma$ -gurjunene                           | 1,4-dimethyl-7-prop-1-en-2-yl-1,2,3,4a,5,6,7-octahydroazulene                                            |
| 41   | $\gamma$ -muurolene                           | 7-methyl-4-methylidene-1-(propan-2-yl)-1,2,3,4,4a,5,6,8a-octahydronaphthalene                            |
| 42   | $\delta$ -selinene                            | 4,8a-dimethyl-6-propan-2-yl-2,3,7,8-tetrahydro-1H-naphthalene                                            |
| 43   | ledene                                        | (1S,2R,4R,11R)-3,3,7,11-tetramethyltricyclo[6.3.0.0 <sup>2,4</sup> ]undec-7-ene                          |
| 45   | bicyclogermacrene                             | (1S,2E,6E,10R)-3,7,11,11-tetramethylbicyclo[8.1.0]undeca-2,6-diene                                       |
| 50   | $\delta$ -cadinene                            | (1S,8aR)-4,7-dimethyl-1-propan-2-yl-1,2,3,5,6,8a-hexahydronaphthalene                                    |
| 53   | 4,5,9,10-dehydro-isolongifolene               | 2,2,7,7-tetramethyltricyclo[6.2.1.0 <sup>1,6</sup> ]undeca-3,5,9-triene                                  |
| 59   | palustrol                                     | 1,1,4,7-tetramethyl-2,3,4,5,6,7,7a,7b-octahydro-1aH-cyclopropa[h]azulen-4a-ol                            |
| 62   | spathulenol                                   | (1aR,4aR,7S,7aR,7bR)-1,1,7-trimethyl-4-methylidene-1a,2,3,4a,5,6,7a,7b-octahydrocyclopropa[h]azulen-7-ol |
| 65   | globulol                                      | (1aR,4R,4aR,7R,7aS,7bS)-1,1,4,7-tetramethyl-2,3,4a,5,6,7,7a,7b-octahydro-1aH-cyclopropa[e]azulen-4-ol    |
| 68   | (+)-bisabola-2,10-diene[1,9]oxide             | 4,7-dimethyl-2-(2-methylprop-1-enyl)-3,4,4a,5,6,8a-hexahydro-2H-chromene                                 |
| 70   | ledene oxide-(II)                             | 3,7,7,10-tetramethyl-2-oxatetracyclo[7.3.0.0 <sup>1,3</sup> .0 <sup>6,8</sup> ]dodecane                  |
| 71   | isospathulenol                                | (1aR,7S,7aS,7bR)-1,1,4,7-tetramethyl-2,3,5,6,7a,7b-hexahydro-1aH-cyclopropa[h]azulen-7-ol                |
| 73   | cubenol                                       | (1S,4R,4aR,8aR)-4,7-dimethyl-1-propan-2-yl-2,3,4,5,6,8a-hexahydro-1H-naphthalen-4a-ol                    |
| 76   | germacra-4(15),5,10(14)-trien-1- $\alpha$ -ol | (1S,5E,7S)-4,10-dimethylidene-7-propan-2-ylcyclodec-5-en-1-ol                                            |
| 78   | 1,4-dimethyl-7-(1-methylethyl)-azulene        | 1,4-dimethyl-7-(propan-2-yl)azulene                                                                      |
| 79   | 14-hydroxy- $\delta$ -cadinene                | (8-isopropyl-5-methyl-3,4,6,7,8,8a-hexahydro-2-naphthalenyl)methanol                                     |

\* Numbering of compounds as in Tables 2a-7 and Table S2a-S4b.

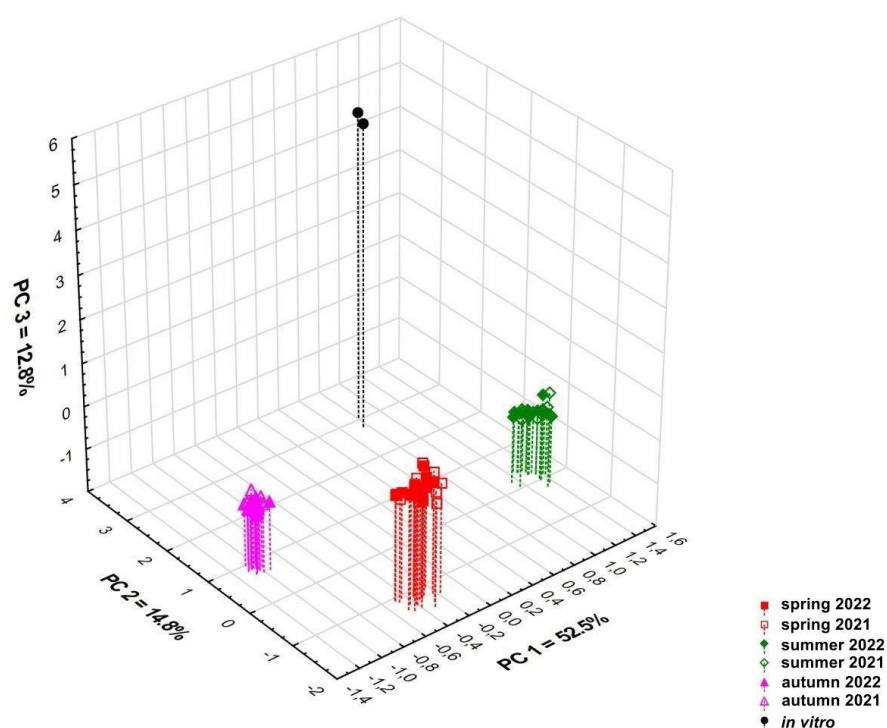

**Figure S7.** Three-dimensional PCA scatter plot based on all 79 detected compounds in samples of *Calypogeia integristipula* collected in spring, summer, autumn in 2022 and 2021 and *in vitro*. The percentage of explained variance ( $R^2X$ ) is 52.5% for PC1, 14.8% for PC2, 12.8% for PC3, and predictive ability ( $Q^2$ ) is 48.2%, 16.7%, and 25.2%, respectively.

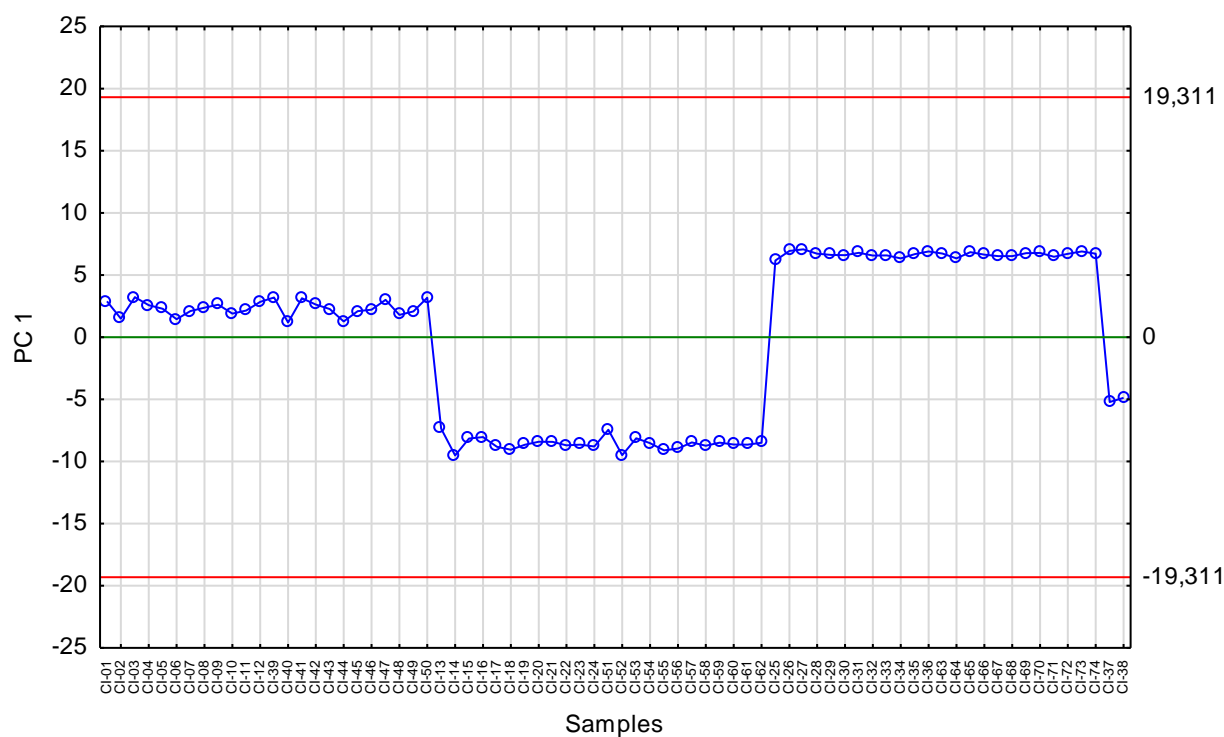

**Figure S8.** Line plot of the component PC1 for the examined samples of *Calypogeia integristipula* collected in 2021 and 2022 and *in vitro* based on all 79 detected compounds. The red lines represent  $\pm 3.00$  standard deviations. SD: 6.637 (Figure S7).

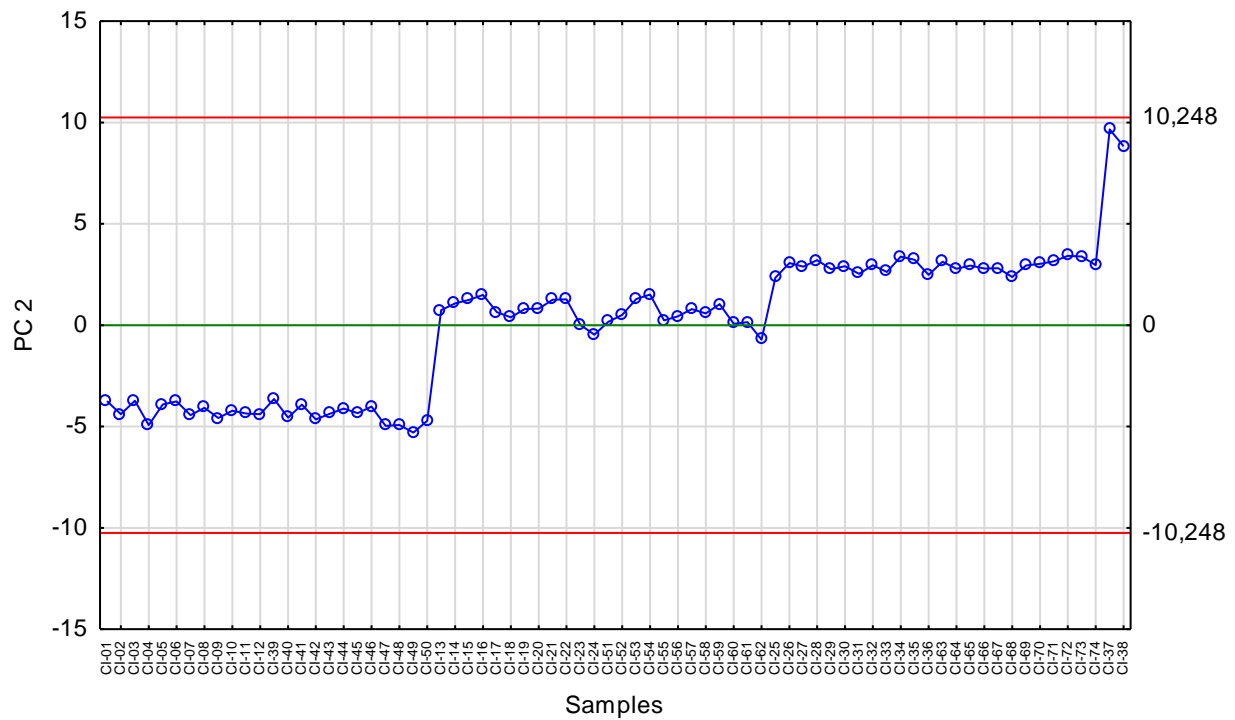

**Figure S9.** Line plot of the component PC2 for the examined samples of *Calypogeia integristipula* collected in 2021 and 2022 and *in vitro* based on all 79 detected compounds. The red lines represent  $\pm 3.00$  standard deviations. SD: 3.416 (Figure S7).

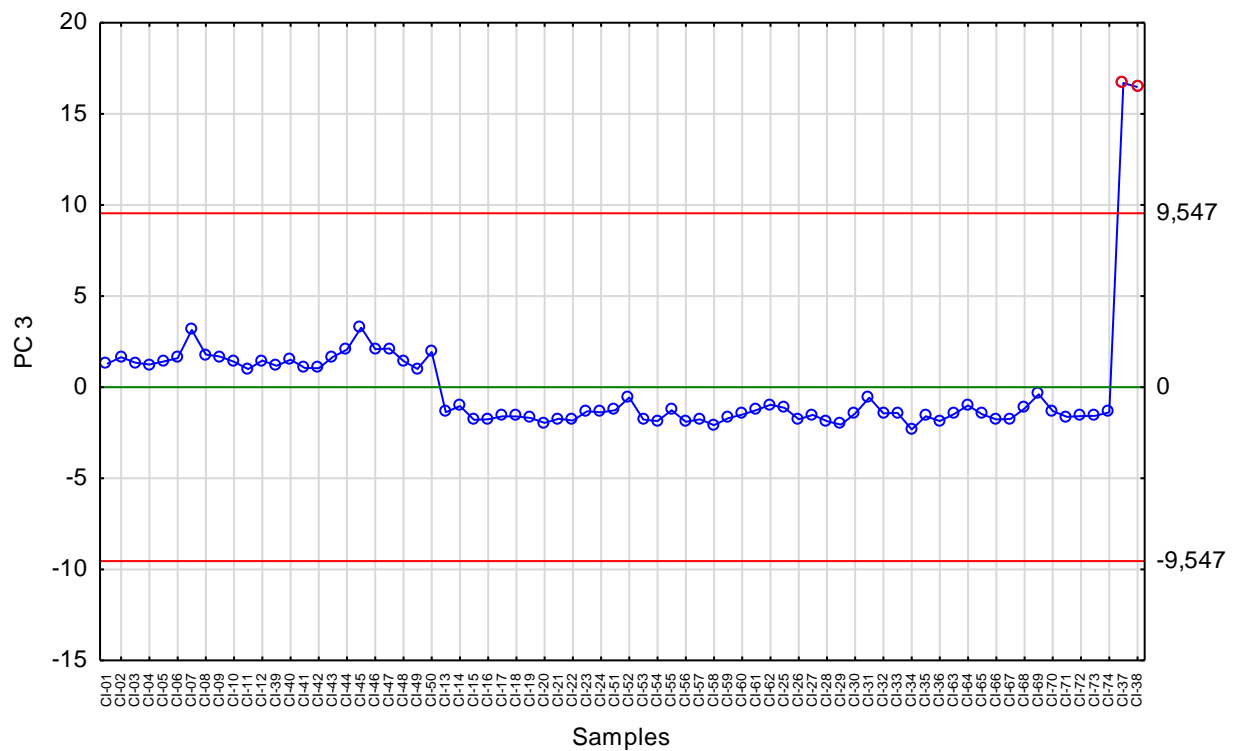

**Figure S10.** Line plot of the component PC3 for the examined samples of *Calypogeia integristipula* collected in 2021 and 2022 and *in vitro* based on all 79 detected compounds. The red lines represent  $\pm 3.00$  standard deviations. SD: 3.182 (Figure S7).

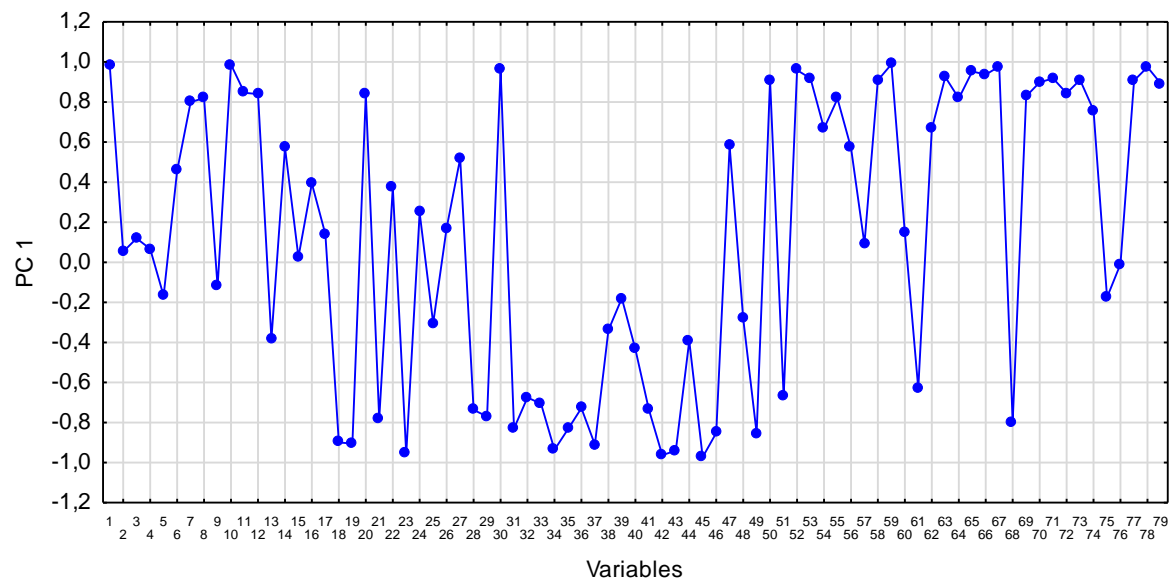

**Figure S11.** Linear plot of the lodgings for the first principal component PC1 (Figure S7).

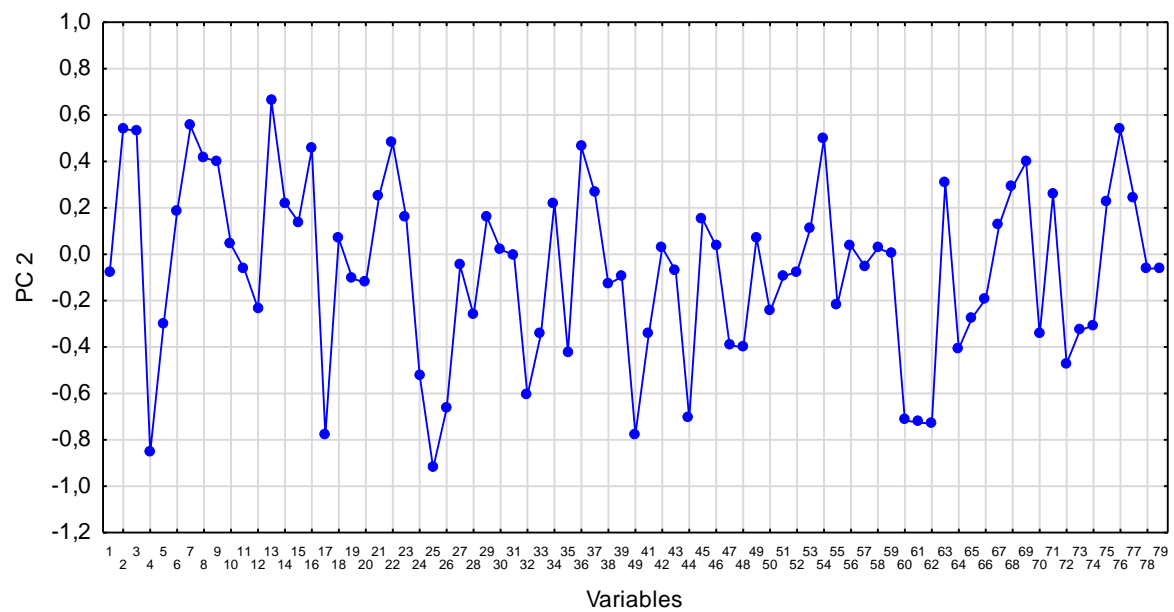

**Figure S12.** Linear plot of the lodgings for the second principal component PC2 (Figure S7).

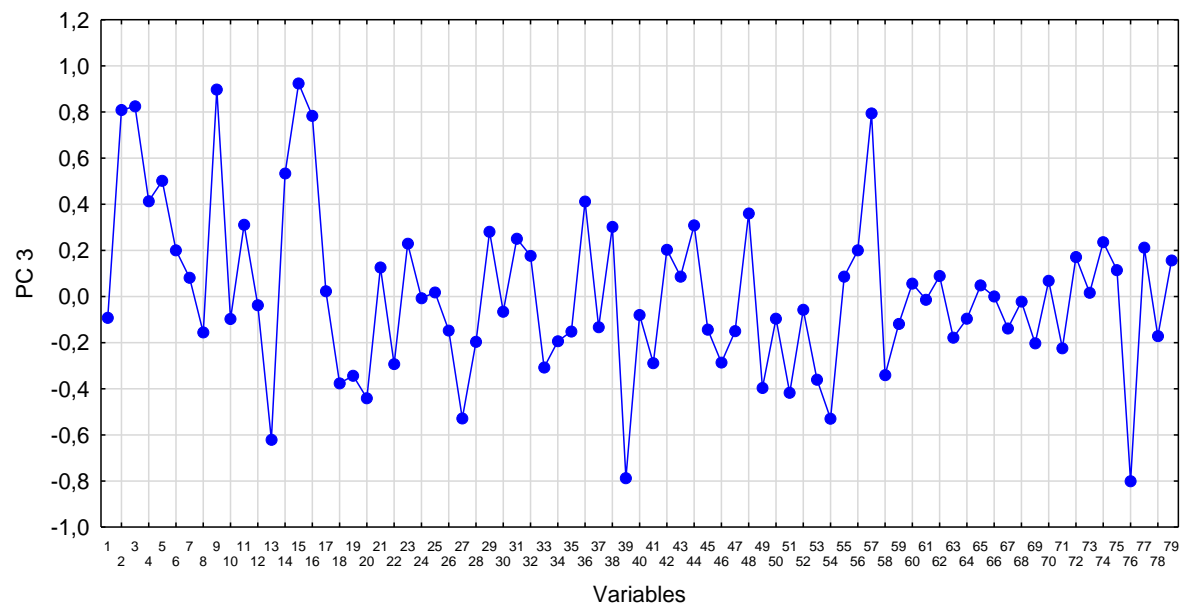

**Figure S13.** Linear plot of the lodgings for the third principal component PC3 (Figure S7).
